1 Acoustic and postural displays in a miniature and transparent teleost fish, *Danionella dracula*

2

3 Rose L. Tatarsky<sup>1</sup>, Zilin Guo<sup>1</sup>, Sarah C. Campbell<sup>1</sup>, Helena Kim<sup>1</sup>, Wenxuan Fang<sup>1</sup>, Jonathan T.  
4 Perelmuter<sup>1</sup>, Eric R. Schuppe<sup>1</sup>, Hudson K. Reeve<sup>1</sup>, Andrew H. Bass<sup>1\*</sup>

5

6 Author information:

7 <sup>1</sup>Cornell University, Department of Neurobiology and Behavior, Ithaca, New York, USA.

8

9 Key Words: Acoustic communication, multimodal, aggression, fish, resident, intruder

10

11 \*Author for correspondence: [ahb3@cornell.edu](mailto:ahb3@cornell.edu)

12

13

14

15

16

17

18

19

20

21

22

23

24

25

26

27

28

29

30

31

## 32 **ABSTRACT**

33 Acoustic communication is widespread across vertebrates, including among fishes. We report  
34 robust acoustic displays during aggressive interactions for a laboratory colony of *Danionella*  
35 *dracula*, a relatively recently discovered miniature and transparent species of teleost fish closely  
36 related to zebrafish (*Danio rerio*). Males produce bursts of pulsatile, click-like sounds and a  
37 distinct postural display, extension of a hypertrophied lower jaw, during aggressive but not  
38 courtship interactions. Females lack a hypertrophied lower jaw and show no evidence of sound  
39 production or jaw extension in such contexts. Novel pairs of size-matched or -mismatched males  
40 were combined in resident-intruder assays where sound production and jaw extension could be  
41 linked to individuals. Resident males produce significantly more sound pulses and extend their  
42 jaw more often than intruders in both dyad contexts, and relatively larger males are significantly  
43 more sonic and exhibit more jaw extensions in size-mismatched pairs. The majority of highest  
44 sound producers in both contexts also show increased jaw extension during periods of  
45 heightened sonic activity. These studies firmly establish *D. dracula* as a sound-producing species  
46 that modulates both acoustic and postural displays during aggressive interactions based on either  
47 residency or body size, providing a foundation for further investigating the role of multimodal  
48 displays in a new model clade for neurogenomic studies of aggression, courtship, and other  
49 social interactions.

50

## 51 **INTRODUCTION**

52 Animals across taxa have distinct behavioral repertoires utilizing a variety of signaling channels  
53 and modalities to mediate complex social interactions (Bradbury and Vehrencamp, 2011). Signal  
54 structure within a modality can further vary at a species or individual level depending on the  
55 environment and social context (Bradbury and Vehrencamp, 2011). Acoustic communication  
56 provides many such examples (e.g., Gerhardt and Huber, 2002), with signals differing in  
57 parameters ranging from amplitude, duration and fundamental frequency to the time interval  
58 between repetitive components within a call and between calls (e.g., Davies and Halliday, 1978;  
59 Clutton-Brock and Albon, 1979; Sebastianutto et al., 2008; Odom et al., 2021). Acoustic  
60 repertoires also often differ between the sexes (Gerhardt and Huber, 2002; Bradbury and  
61 Vehrencamp, 2011). In many species of teleost fish, males often exhibit more diverse acoustic  
62 repertoires than females, although detailed investigations of female sound production are scarce

63 (Amorim, 2006; McIver et al., 2014; Pereira et al., 2014; Amorim, 2015; Ladich and Maiditsch,  
64 2017). Sex differences in soniferous behavior often reflect underlying structural dimorphisms  
65 that are frequently associated with hypertrophied muscles driving swim bladder vibration or  
66 stridulation of pectoral fin rays that lead to sound production (Rice et al., 2022). From an  
67 ecological perspective, sound production can figure prominently into aggressive competition for  
68 mates, nest sites, shelters, and territories (Andersson, 1994). Sonic signaling can enable contests  
69 to be resolved through less costly measures before escalating to more intense stages of  
70 engagement involving direct contact and possible physical damage (e.g., Davies and Halliday,  
71 1978; Clutton-Brock and Albon, 1979, Hsu et al., 2008; Oliveira, Silva and Simo, 2011; Green  
72 and Patek, 2018). In so doing, these signals may communicate information about a contestant's  
73 identity (e.g., age and sex), motivation to fight for a resource item, which is often associated with  
74 higher signaling display rate (Burmeister et al, 2002; Arnott and Elwood, 2007; Triefenbach and  
75 Zakon, 2008), and physical attributes such as body size, which can figure prominently into  
76 determining the outcome of aggressive conflicts (e.g., Davies and Halliday, 1978; Clutton-Brock  
77 and Albon, 1979; Bradbury and Vehrencamp, 2011; Amorim, 2015; Conti et al., 2015; Billings,  
78 2018).

79 Our main intent here is to provide a behavioral baseline for studies of acoustic  
80 communication during social interactions in *Danionella dracula*, a miniature species of  
81 cypriniform fish (Britz and Conway, 2016) that we report are sonic and can be readily bred in  
82 captivity. We describe sound production in *D. dracula* mainly within the context of aggressive  
83 interactions because we found that males produce relatively simple, broadband sounds  
84 apparently solely during aggressive but not courtship encounters; females appear to be silent  
85 during all such interactions. Given the close phylogenetic relationship of *Danionella* species to  
86 zebrafish (*Danio rerio*), they are also amenable to genetic manipulation using the zebrafish  
87 molecular toolbox (Schulze et al., 2018). *Danionella dracula* and its sister species further offer  
88 multiple advantages for behavioral neuroscience given their especially small size as adults (see  
89 below) and transparency into adulthood (e.g., Fig. 1A-C), thus facilitating non-invasive, optical  
90 imaging of the brain using multiphoton microscopy (Schulze et al., 2018, Chow et al., 2020;  
91 Akbari et al., 2020, Akbari et al., 2021). Despite possessing these attractive features for genetic  
92 and neural studies of social behavior, these behaviors have not yet been described in a  
93 comprehensive manner for any *Danionella* species.

94 *Danionella dracula* was first described in 2009, known only from a small stream in the  
95 Kachin state in northern Myanmar (Britz, Conway and Rüber, 2009, Britz and Conway, 2016,  
96 Britz, Conway and Rüber, 2021). Nothing is known regarding the specifics of its behavior in the  
97 wild, largely because its natural habitat is currently relatively inaccessible due to political unrest  
98 (e.g., see Goldman, 2021; UN Human Rights Council, 2018). Like other members of the genus,  
99 *D. dracula* exhibits developmental truncation, as they retain some larvae-like traits as miniature  
100 adults (paedomorphy) and only reach 12-18 mm in standard length (Britz, Conway and Rüber,  
101 2009; Britz and Conway, 2016; Conway, Kubicek, and Britz, 2021; this report). Morphological  
102 studies predicted a sex difference in soniferous behavior for *Danionella* species based on  
103 documentation of a putative sonic “drumming apparatus” in adult males, but not females (Britz,  
104 Conway and Rüber, 2009, Britz and Conway, 2016, Britz, Conway and Rüber, 2021, B.  
105 Judkewitz, personal communication). Sound production was reported earlier for male *D.*  
106 *cerebrum* (Schulze et al., 2018; initially designated *D. translucida*, see Britz, Conway and Rüber,  
107 2021). Unlike other species within the genus so far described, *D. dracula* has a hypertrophied  
108 lower jaw and a series of odontoid processes that resemble fangs (Britz and Conway, 2016).

109 We report the establishment of a laboratory-based breeding colony of *D. dracula* to study  
110 courtship and aggressive behavior over the use of nest sites. Furthermore, we present the results  
111 of a resident-intruder assay to examine acoustic and postural signaling during dyadic aggressive  
112 interactions in size-matched and size-mismatched male encounters. Previous research in  
113 aggression has utilized behavioral tests like resident-intruder assays (see Koolhaas et al., 2013)  
114 and other dyadic designs to study how two individual males can compete over a resource and  
115 what signaling parameters correlate with differences in the ability for an animal to win a contest,  
116 i.e., the animal’s resource-holding potential (RHP; see Bradbury and Vehrencamp, 2011). To  
117 investigate the effect of two factors that contribute to fighting ability, residency status and  
118 relative body size (see Hack, Thompson and Fernandes, 2010; Jennions and Backwell, 1996;  
119 Jackson and Cooper, 1991), on agonistic signaling behaviors in *D. dracula*, we focused our  
120 quantitative analyses on two prominent display characters that we show distinguish *D. dracula*  
121 from others within the genus: temporal features of acoustic signals and extension of the  
122 hypertrophied lower jaw. Our original intent was to only investigate acoustic displays. However,  
123 we noticed early on that males often extended their lower jaw during sound production. This  
124 suggested that sonic activity may depend biomechanically on jaw extension, reminiscent of the

125 involvement of jaw movement in clownfish (*Amphiprion clarkii*) sound production (Olivier *et*  
126 *al.*, 2015). Thus, we hypothesized that the amount or temporal pattern (e.g., inter-pulse interval)  
127 of sound production and jaw extension by an individual male would be influenced by residency  
128 and/or relative size.

129

## 130 **MATERIALS AND METHODS**

### 131 **Colony formation and breeding**

132 Adult *D. dracula* were originally purchased from commercial dealers (The Wet Spot Tropical  
133 Fish, Portland, OR; Invertebrates by Msjinkzd, York, PA) and bred in environmental control  
134 rooms at Cornell University, Ithaca, NY. Fish were kept at water temperatures of 23-25.5° C and  
135 on a 16:8 light: dark cycle. We found that *D. dracula* breeds best with direct overhead lighting.  
136 Fish were kept in rooms with artificial or mixed natural and artificial overhead lighting. There  
137 were no obvious differences in social behavior, breeding, or rates of development between the  
138 two lighting conditions. All dyad contests were conducted in rooms supplemented with artificial  
139 lighting on a 16:8 light: dark cycle. All animals were fed twice a day, *Artemia nauplii* in the  
140 morning and ground fish flake (TetraMin Tropical Flake) in the evening. Plastic plants were  
141 added to each tank for fish to acclimate to the aquarium setting. We also found that *D. dracula* is  
142 a diurnal species, with more sonic activity during daylight hours, like their sister species, *D.*  
143 *cerebrum* (Schulze *et al.*, 2018). All behavioral observations for colony, community, and dyad  
144 tanks were carried out between 09:00 – 17:00 h. All procedures were approved by the  
145 Institutional Animal Care and Use Committee of Cornell University.

146 Fish were bred in 2.5-125 gal aquaria that housed populations of varying density based  
147 on tank size, in ratios of 1:2 males: females, with at least three males per tank (Fig. 1D). Nest  
148 sites were made from double sponge water filters (XY-2822 Air Pump Double Sponge Water  
149 Filter, Xinyou) that contained nine 4-mm crevices for spawning (Fig. 1E). The sponges were  
150 placed at opposite ends of the tank (Fig. 1D) and covered with a BIO-CHEM ZORB filtration  
151 cartridge (API Fishcare CRYSTAL Filtration Cartridge), as it is required for the crevices to be  
152 enclosed for breeding (Fig. 1E). Eggs were collected daily by removing the nest, unrolling the  
153 filtration cartridge and gently moving the clusters of eggs to acrylic cylinders (10 cm diameter)  
154 with a mesh bottom that rested within a 50-gal aquarium (see eggs in Fig. 1E). Larval fish were  
155 fed AP100 Dry Larval Diet (Zeigler Bros, Inc.) twice a day for 10 d in these smaller cylinders

156 before being moved to 5-gal tanks where they were fed adult diet. Larvae became adults in 3  
157 mos, visually determined by the presence of eggs in the abdomen of females and the  
158 hypertrophied jaw in males.

159

### 160 **Community tank observations**

161 A 16.8-gal community tank with dimensions 75 x 30 x 28 cm was set up using the same  
162 parameters for colony system tanks to allow for behavioral observations in a reproductive  
163 context (Fig. 1D). A heater kept the tank at 25°C. Males (3) and females (6) were placed into the  
164 tank 30 mins after dye labeling. Each male had a muscle segment labeled in the tail with either  
165 red, green, or black dye to allow three independent observers to determine identity while  
166 watching the tank and in video recordings (Tissue Marking Dye Kit, MDT100, Sigma-Aldrich).  
167 Females were also labeled using the same method, thus all fish in the tank went through the same  
168 injection process. Sounds were recorded with a hydrophone (Aquarian Audio H1a) placed next  
169 to each nest site and connected to a 30-fps video camera (Canon Vixia HFR500) using a mono to  
170 stereo adaptor to synchronize the audio collection with the video.

171 Fish were allowed an acclimation period, which concluded after one week at the onset of  
172 courtship. Then, three independent observers used the software BORIS (Friard and Gamba,  
173 2016) to conduct focal sampling and live observation, alongside collecting video and acoustic  
174 data centered on the two nest sites, to observe each of the three labeled males. Behavioral  
175 observations were based on three randomly selected, 15-min periods, made up of three 5-min  
176 periods where each of the different focal males were observed, between 09:00 and 17:00 for each  
177 of seven days. Fish received the same diet regime as colony tanks, with the first feeding at 10:00-  
178 10:15 and the second at 17:00. Live observations were synchronized to the video with a red LED  
179 pressed at the start of the observation period by the observer. Observers sat 46 cm in front of the  
180 tank and used keystrokes to signify behavioral events of interest in the focal male (Table S1).  
181 These characterizations were verified with the video camera and sound data collected.

182

### 183 **Resident-intruder assays**

184 Males were removed from colony tanks 22 h before the resident-intruder assay. The resident  
185 male was housed in the experimental rectangular tank, which was 14 cm x 5 cm x 5 cm (Fig.  
186 2A). The intruder male was housed separately in an 8 cm x 8 cm x 8 cm tank. Both tanks

187 contained the same volume of water, 315 cm<sup>3</sup>, with a similar depth of 4.5-5 cm. Males were  
188 selected for the dyads to be as close as possible in size (standard length: 13.19-17.94 mm), with  
189 the relative size difference between males being less than 0.5 mm (0.2-2.9% relative size  
190 difference). Taking advantage of adult male color variation, which is not observed in adult  
191 females (Fig. 1A-C), residents and intruders were selected to be different colors in size-matched  
192 assays to make them readily obvious in the videos. One male was greener in coloration than the  
193 other, which was more pale yellow; half of the size-matched residents were pale yellow, and half  
194 were green (Fig. 1A, B). There was no apparent effect of color on total sound production in size-  
195 matched contests ( $F_{1,85}=1.42$ ,  $p=0.2361$ ). However, color is among the many possible variables  
196 that could be controlled and/or manipulated in future studies, especially with a large sample size.  
197 Resident-intruder assays were also performed with size-mismatched dyads. Residency and  
198 relative size status were counterbalanced across dyads. In size-mismatched contests, males were  
199 easily distinguished from each other in the videos based on size, as one fish was distinctly larger  
200 than the other in each of the assays. The relative size difference between males in the dyads  
201 ranged from 1.6 to 4.4 mm (standard length larger fish: 14.64-17.81 mm; smaller fish: 12.08-  
202 13.86 mm; 11-28% relative size difference). Fish were fed their community tank diet in the  
203 evening and morning before testing. Both tanks were aerated with an air stone, and water was  
204 novel system water that had not housed adult fish previously. Three of the four tank walls were  
205 black and opaque, allowing for better contrast for later fish identification. The experimental tank  
206 used to run resident-intruder trials alone contained a hydrophone (Aquarian Audio H1a). The  
207 size of the hydrophone was chosen to best resemble a *D. dracula* nest site; this type of  
208 hydrophone has been observed to elicit crevice-seeking behaviors in males. Following a 22 h  
209 acclimation period lasting from 13:30 on day 1 until 11:30 on day 2, each resident-intruder trial  
210 lasted for 2 h, beginning at 11:30 (Fig. 2B). The intruder male was added to the experimental  
211 tank with a small net to begin the resident-intruder assay (Fig. 2B, C). Sound production and  
212 video were recorded through the hydrophone attached to a 30-fps video camera (Canon Vixia  
213 HFR500). Two of the 10 size-matched dyads were removed from analysis as the fish did not  
214 acclimate, swimming continuously against the sides of the miniature tank. Two of the 10 size-  
215 mismatched dyads were removed from analysis. In one dyad, both fish were swimming  
216 continuously against the sides of the miniature tank. In the second dyad, both fish were intensely  
217 engaged in an escalated aggressive interaction making it impossible to ascertain the identity of



218 the sound producer (similar to extended aggressive interactions in community tanks). Therefore,  
219 8 dyads were analyzed for each context, size-matched and mismatched.

220 Five single-male control trials were conducted following the same procedure, but only  
221 one male was placed in the experimental chamber and an intruder male was not added to the  
222 chamber at the start of the 2 h trial. Five additional control dyads were conducted using male-  
223 female pairs. Five males and five females (standard length: males, 14.06-17.08 mm; females,  
224 13.73-17.12 mm) were combined in single pairs in the experimental tank following the same  
225 procedure, varying in size differences between males and females (0.3-3mm; 2-20% relative size  
226 difference). Two of the residents were male and three were female.

227

### 228 **Audio recordings and analysis**

229 Hydrophone recordings of resident-intruder trials lasted for the full two hours. Due to the large  
230 number of sounds observed in the 2 h period, the oscillogram from each hydrophone recording  
231 after the initial acclimation period was split into six 5 min long time-periods separated by 15 min  
232 intervals (Fig. 2D). Sound characteristics in Table 1 were measured using Raven Pro 1.6 (K. Lisa  
233 Young Center for Conservation Bioacoustics, 2021) Recordings typically displayed a high signal  
234 to noise ratio (e.g., Fig. 2D). Pulse duration was determined by first measuring the maximum  
235 amplitude of an individual sound pulse's waveform. This value was then divided by 4 to get a  
236 quarter amplitude value, and the pulse duration was determined as the duration of the pulse  
237 where waveform peaks were all greater than the quarter amplitude value. Pulse peak frequency  
238 was measured for each pulse after selecting the pulse using the pulse duration criteria above,  
239 using Raven's Peak Frequency measurement. This measurement in Raven is calculated from the  
240 spectrogram of the sound and is the frequency at which the maximum/peak power occurs within  
241 the selection. On the recording, we observed individual pulses occurring very close to each other  
242 in time, forming apparent clusters composed of multiple pulses. We measured the duration of  
243 time between all neighboring individual pulses, the inter-pulse interval (IPI), and pooled all the  
244 male IPI data together. We used the mode value of 34 ms (Fig. S1) to set boundaries for  
245 individual burst types, where pulses that composed a burst had to possess an IPI within two  
246 standard deviations of the mode, or be less than 70 ms apart. This criterion allowed us to identify  
247 burst types ranging up to 6 pulses in length. All IPIs greater than 70 ms were defined as inter-  
248 burst intervals (IBI), i.e., the duration of time between bursts composed of multiple pulses.



249 Table 1. Sound Characteristics and Definitions in *D. dracula*

| Sound Characteristic | Definition                                                                                              |
|----------------------|---------------------------------------------------------------------------------------------------------|
| Pulse Duration       | Total duration of one individual sound pulse.                                                           |
| Peak Pulse Frequency | Frequency at which the maximum peak power occurs within one individual sound pulse.                     |
| Burst                | A train of individual pulses (1-6 observed), where pulses are separated by $\leq 70$ ms.                |
| Inter-Pulse Interval | Time between individual pulses in a single burst of pulses, where pulses are separated by $\leq 70$ ms. |
| Inter-Burst Interval | Time between individual bursts, where interval between two successive pulses is $\geq 70$ ms.           |

250  
251 To characterize the amplitude range of *D. dracula* sound pulses, we recorded sound  
252 production using a calibrated hydrophone (8013, Brüel & Kjaer) connected to a conditioning  
253 amplifier (2635, Brüel & Kjaer) captured on a digital recorder (LS-12, Olympus). We first  
254 recorded sounds in a large community tank (122 x 46 x 74 cm, ~100 gal) with 75 fish and 4 nest  
255 sites (one in each corner of the tank). The hydrophone was suspended 15 cm beneath the water  
256 surface and equidistant (15.24 cm) between two nest sites on the left side of the tank. We  
257 analyzed sounds from 2 h of audio recorded 10:00-12:00. We next recorded sounds in the  
258 resident-intruder assay in an acoustic isolation chamber (Industrial Acoustics). The hydrophone  
259 was positioned 2 cm from the right side of the rectangular experimental tank. Two size-matched  
260 males were introduced to the tank as previously described and 1 h of audio was captured. Sound  
261 pulses were isolated and analyzed in Raven Pro 1.6 using a custom script.

262

### 263 **Video analysis of sound production and jaw extension behavior**

264 For the resident-intruder assays, an observer blind to resident-intruder status verified instances of  
265 male sound production by watching the synchronized video at 0.3X the normal speed. Sound  
266 bursts were attributed to an individual male based on associated lunging movement. This  
267 association between lunging and sound production was established based on our analysis of a 4  
268 min portion of a 23 min recording of a *D. dracula* male continuously lunging at its reflection in  
269 the wall of the tank (Fig. 4B, oscillogram in C, Movie 1) For this recording, an observer first  
270 coded in BORIS all lunges directed at the reflection, without sound. The time point of an  
271 instance of lunging was determined as the first frame where the male fish oriented its head  
272 towards and swam rapidly towards its reflection. Burst and pulse start times from the same  
273 portion of the recording were measured using Raven Pro 1.6, so the time between a lunge and a  
274 burst could be examined for temporal proximity, as is described in the results (see Fig. S2A).

275 Observers distinguished fish in the size-matched assays based on coloration: green or  
276 pale yellow (see above), as well as other identifying features such as body girth. In size-  
277 mismatched assays, one fish was distinctly larger than the other and the two fish could be readily  
278 identified based on relative size. Coding of jaw extension was done by a third observer in BORIS  
279 who watched the video at 0.3X the normal speed without sound. The time point of an instance of  
280 jaw extension was determined as the first frame where the lower jaw was first extended from the  
281 head.

282

### 283 **Statistical analyses**

284 Statistical analyses were performed in R version 4.1.1 using the lme4 package (R Core Team,  
285 2021). We investigated whether agonistic behaviors varied between residents and intruders  
286 across each behavioral context. To do this, we ran a repeated measures Linear Mixed Model  
287 (LMM) with pair identity as a random effect to examine if agonistic behaviors differed between  
288 residents or intruders in the size-matched context, and whether this usage may change across the  
289 length of the behavioral trial (e.g., time-periods 1-6 of behavioral sampling; see above for more  
290 details about sampling). As in the previous models, we also investigated if overall behavior  
291 usage varied between residents and intruders, and large and small fish in size-mismatched

292 contests, including both residency and size as predictors and an interaction term for residency  
293 and size.

294 To test the hypothesis that multi-pulse burst usage may vary between residents or  
295 intruders in the different contexts, we reduced each animal's multi-pulse bursts (2 – 6  
296 pulses/burst) into a single metric. As such, we performed a principal component analysis (PCA),  
297 using the *psych* package and *principal* function. In these models, we entered the number of  
298 different burst types for each male into R, and generated PCs separately for size matched and  
299 mismatched contexts. Higher PC scores represented greater multi-pulse burst usage. To next  
300 investigate whether PC1 (multi-pulse burst usage) varied between residents and intruders in the  
301 size-matched context, we used a LMM with pair identity as a random effect. In size mismatched  
302 contests, we also used a LMM to investigate whether multi-pulse burst usage differed between  
303 residents and intruders as well as large and small individuals' size, by including both residency  
304 and size as predictors and an interaction term for residency and size. Finally, using total sound  
305 production as a continuous variable, we tested whether overall sound production was related to  
306 multi-pulse burst usage (PC1) by using a linear model separately for size-matched and -  
307 mismatched contexts.

308

309

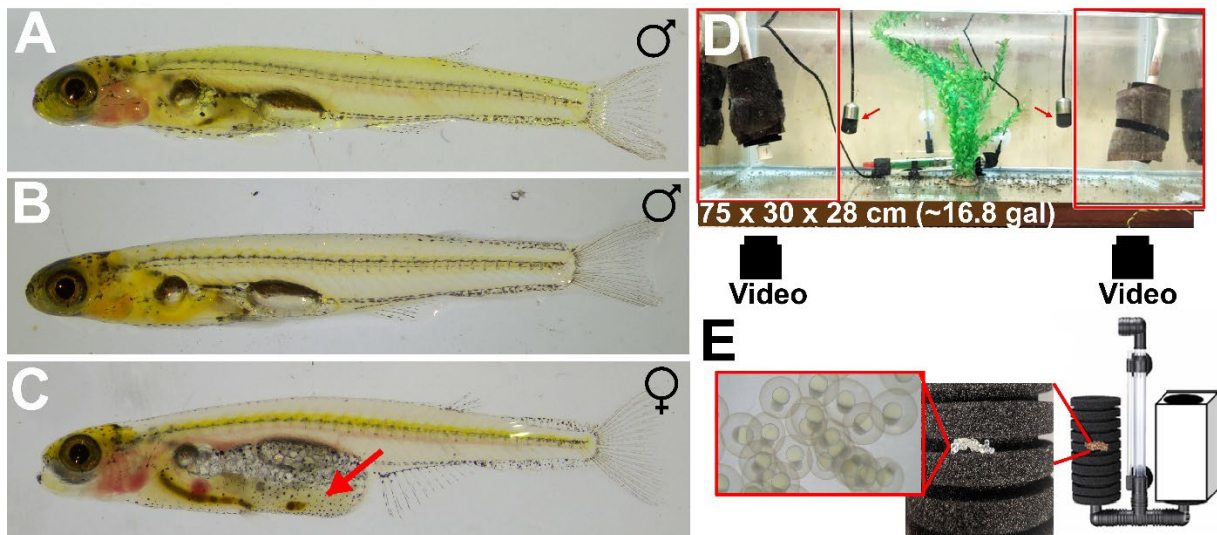

311 Fig. 1: Male and female *Danionella dracula* and community tank. A. Adult male with green to  
312 yellow-green coloration, standard length (SL) = 17.2 mm B. Adult male without green  
313 coloration, SL = 16.8 mm. C. Adult female without green coloration, SL = 17.1 mm. Ovary  
314 indicated by red arrow. D. Community tank setup (details in Materials and Methods); red boxes

315 at either end indicate video camera field of view. External video cameras indicated by black  
316 boxes below tank. Red arrows indicate hydrophones. E. Eggs in nest site: insets from left to right  
317 show developing eggs, egg cluster in crevice of sponge filter nest site, and schematic of nest site  
318 used for egg collection.  
319  
320

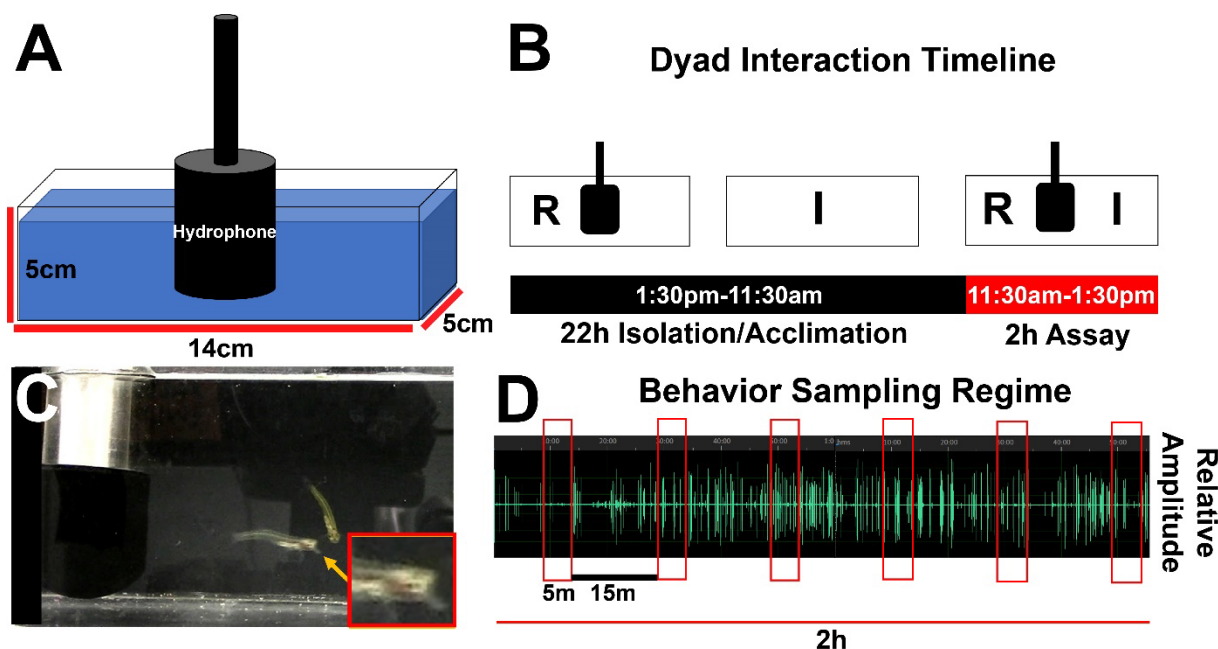

322 Fig. 2: Dyad testing tank for male *Danionella dracula*. A. Experimental tank schematic;  
323 dimensions: 14 cm x 5 cm x 5 cm. Black cylinder represents the hydrophone. B. Dyad interaction  
324 schematic and timeline. R stands for Resident and I for Intruder male. Black indicates the 22 h  
325 isolation/ acclimation period (1:30pm-11:30am) that fish undergo before the 2 h assay (11:30am-  
326 1:30pm), which is indicated in red. C. Two males in testing tank, one with jaw extended as it  
327 lunges at the other. Extended jaw indicated with orange arrow; insert is closeup of anterior body  
328 region and jaw. D. Behavior sampling regime. Red boxes on oscillogram (sounds in green)  
329 indicate six 5 min time periods sampled at 15 min intervals (black line) over 2 h assay.  
330

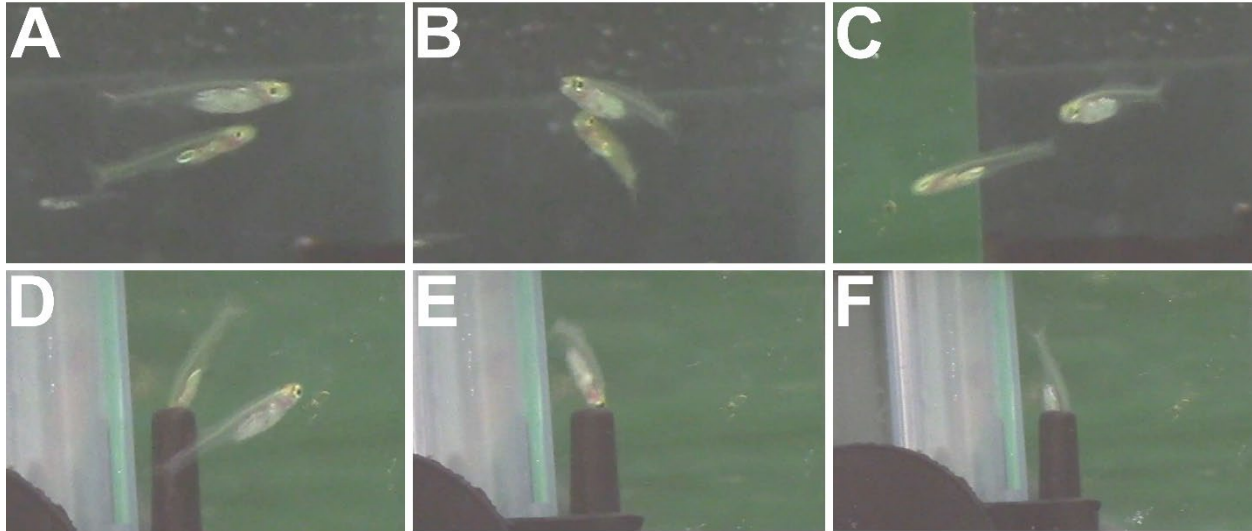

332 Fig. 3: Video frames of *Danionella dracula* courtship behavior in colony tank. A. Male swims  
333 below female B. Male vibrates his body back and forth beneath female egg vent. C. Female  
334 follows male back to nest entry crevice (part of an underwater filter). D. Male enters headfirst  
335 into crevice E. Female orients head towards crevice. F. Female swims headfirst into crevice.  
336

## 337 RESULTS

338 As stated in the Introduction, our main goal here is to provide a behavioral baseline for studies of  
339 acoustic communication during social interactions in *Danionella dracula*. For general context,  
340 we first provide qualitative descriptions of courtship, spawning and male aggressive behavior in  
341 a breeding colony of *D. dracula*, the first known laboratory colony of this species. We focus on  
342 males, as we found that they are the apparent sonic sex in this species and apparently only make  
343 sounds during aggressive encounters. Then, we provide quantitative assessments of acoustic  
344 signaling during resident-intruder male interactions, including a description of spectral and  
345 temporal properties of sound pulses. We also assess a prominent postural display, extension of  
346 the hypertrophied lower jaw, which is an additional display behavior that we found occurs along  
347 with sound production during aggressive interactions and distinguishes *D. dracula* from other  
348 species within the genus.

349

### 350 Courtship and spawning

351 *Danionella dracula* readily bred and produced courtship and aggressive behaviors in laboratory  
352 colony and community tank settings. Although we focus on male aggression in this report, we  
353 first provide a representative description of courtship and spawning in a colony tank, where we



354 first observed these behaviors, for broader context here and in future studies. No sound  
355 production was ever recorded during either courtship or spawning in our colony and community  
356 tanks. Males typically swam from nest sites to court females who were often schooling around  
357 the tank. Fig. 3A-F show single frames from a video record of courtship and spawning in the  
358 presence of a black vertical tube that was originally part of an underwater filtration system in a  
359 colony tank (also see Movie 2). The male approached a female and swam beneath her, directly  
360 hovering beneath her egg vent (Fig. 3A, B). He then rapidly moved his pectoral fins and vibrated  
361 his body and head back and forth beneath the female. Next, the male swam back to the nest site  
362 that he swam closely around during the day. The female swam behind the male to the same nest  
363 (Fig. 3C) and the male then entered the spawning crevice head-first (Fig. 3D) followed by the  
364 female (Fig. 3E, F). After spawning, the female left the nest and the male emerged from the nest.  
365 He then swam closely around the nest, which we refer to as nest circling, and courted additional  
366 females throughout the day.

367         Spawning cannot be directly observed in either colony or community tank settings as it  
368 only occurs in enclosed crevices. It is inferred to take place in the crevices for two reasons. First,  
369 clutches of 12-24 eggs are found in the crevices of the artificial sponge nests; eggs are found in  
370 nest grooves at any time of the light cycle following spawning interactions (see Fig. 1E). Second,  
371 we often find a male and/or a female on top of a cluster of eggs within the grooves of a sponge  
372 nest during daily nest checks.

373

### 374 **Male aggressive displays**

375 In colony tanks, we often observed males swimming throughout the day around artificial nest  
376 sites that are dark-colored objects containing crevices for spawning (see Fig. 1D, E). By  
377 observing dye-marked males in a controlled community tank setting over a two-week period, we  
378 often recorded the same male swimming within 2-3 body lengths around the same nest site for 1-  
379 8 days, suggesting nest fidelity. These males also lunged at other males who swam within 2-3  
380 body lengths around the nest site, often producing a burst of stereotyped sound pulses close to  
381 the same time as the lunge (Fig. 4A).

382         We concluded that sound production is primarily coupled to lunges at intruder fish, or the  
383 visual presence of another male, in the contexts critically assessed in our study. We reached this  
384 conclusion after combining these colony tank observations with another colony tank video

385 recording of a male lunging continuously against its own reflection at the same time as apparent  
386 sound production (Fig. 4B; oscillogram from recording in 4C, see Movie 1). For a representative  
387 4-min portion of this recording where the male lunged continuously at his reflection, we found  
388 that sounds were produced when the male was within one body length of its reflection in the tank  
389 wall, with its head and body oriented and moving towards its reflection in the tank wall (Movie  
390 1). By contrast, there was essentially no evidence of sound production in a portion of the  
391 recording when the male was swimming around the nest and not lunging at its reflection (labeled  
392 in Fig. 4C); the two pulses one can see during the quiet period are timed with the fish lunging at  
393 another fish (Fig. 4C). We pooled together all the times between lunges and sounds and found a  
394 mean value of  $579 \pm 27$  ms; 88.4% of sound bursts and lunges ( $n=107/121$ ) were less than 600  
395 ms apart, closely temporally related (Fig. S2A).

396 In colony tanks, we also observed extended aggressive interactions lasting up to 30 mins  
397 that escalated to include mutual lunging, extension of the lower jaw, and vertical lateral displays  
398 until one male fled. It was not possible to readily assign sound production to either male during  
399 such interactions.

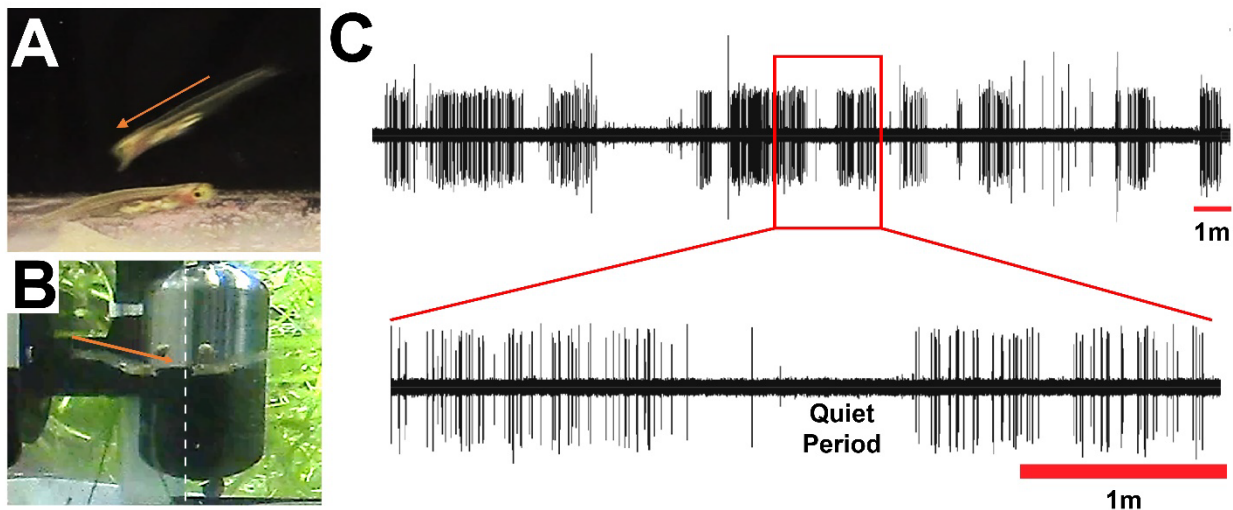

401 Fig. 4: Video frames and oscillogram of *Danionella dracula* male-male aggressive interaction.  
402 A. Frame from resident-intruder assay of male lunging at other male and extending its lower jaw;  
403 direction indicated by orange arrow. Both resident and intruder males lunge and produce sound  
404 pulses. B. Frame from male lunging at its own tank reflection. Direction of lunge towards tank  
405 glass indicated by orange arrow extending above entire dorsum of lunging male. White dashed  
406 line indicates reflective surface of tank wall. C. Oscillogram from 23 min recording of male in  
407 'B' lunging at its reflection in tank wall on two timescales. Lower trace is 4 min section of the  
408 recording to show individual sound pulses. "Quiet Period" indicates period when focal fish was  
409 not oriented towards its reflection and was swimming around nest.



410

### 411 **Sound production during resident-intruder assay**

412 To characterize sound production during aggressive interactions, we examined dyads in a  
413 resident-intruder context (Fig. 2A). Single male controls did not produce sounds and swam  
414 around the experimental chamber. There was also no evidence in male-female dyads that females  
415 made any sounds similar to males, consistent with absence of the putative sonic “drumming”  
416 muscle in females (Britz and Conway, 2016). A hydrophone placed in a 20-gal tank of 10 female  
417 fish for 10 h also did not provide any evidence of sound production by females.

418 Dyad interactions appeared to be primarily one-sided, where one fish emerged as the  
419 more apparent aggressor towards the other; 94.7% of total sounds (2705/2858) were associated  
420 with one male’s distinct lunge at the other fish (see example in Movie 3). 5.3% of sounds were  
421 too ambiguous to associate a sound with one male over the other, and they were not included in  
422 our consequent analyses. Out of these ambiguous cases, sound pulses could not be attributed  
423 identity because both fish were oriented towards each other and lunging at the same time as  
424 sound production (3.0%, 87/2858); both were swimming next to each other closely with their  
425 heads oriented towards each other but with no distinct lunges during sound production (1.4%,  
426 41/2858), or both were obscured by the hydrophone or by both being in a corner of the tank  
427 (0.9%, 25/2858).

428 Males produced trains of sound pulses composed of repetitive bursts of up to 6 pulses per  
429 burst (see Table 1 for definition). In the dyad assay tank, individual sound pulses had a mean  
430 peak frequency of  $1988.6 \pm 14.0$  Hz and  $1961.6 \pm 11.5$  Hz in size-matched and -mismatched  
431 contexts, respectively (see Fig. 5A - example spectrogram in 5A). Mean pulse duration was  $2.0$   
432  $\pm 0.02$  ms and  $2.6 \pm 0.03$  ms for size-matched and -mismatched males, respectively (Fig. 5C).  
433 The mean IPI was  $42.9 \pm 0.6$  ms and  $39.5 \pm 0.5$  ms in size-matched and mismatched contexts,  
434 respectively (e.g., see 2- and 3-pulse bursts in Fig. 5B). In both dyad contexts, males primarily  
435 used single pulses (size-matched, 65.3% of all bursts; size-mismatched, 64.1%) and 2-pulse  
436 bursts (size-matched, 23.4%; size-mismatched, 27.1%) that overlapped with lunging at other  
437 males (Fig. 5D). Three and higher pulse bursts occurred more rarely, with 3-pulse bursts making  
438 up 8.1% and 7.9% for size-matched and -mismatched male dyads, respectively (Fig. 5D). Four  
439 pulse and higher burst types made up only 3.2% and 0.9% for size-matched and -mismatched  
440 males, respectively (Fig. 5D). Individual fish produced multiple types of bursts containing

441 differing numbers of pulses throughout the interaction (e.g., see Fig. 5B). Mean IBI was  
442  $12.6 \pm 1.6$  s and  $10.5 \pm 0.7$  s for size-matched and -mismatched contests, respectively.

443 We did not measure sound amplitude in the assays given our inability to measure sounds  
444 from individual sound producing fish that were always moving around one hydrophone during  
445 these dyadic interactions in small volumes. In a separate set of tests designed explicitly to  
446 characterize the amplitude range of *D. dracula* sound pulses, we recorded 365 sound pulses in a  
447 100-gal community tank, where we found an amplitude range of 141.5-153.09 dB re 1  $\mu$ Pa.  
448 When recording males in the miniature resident-intruder assay tank, we found an amplitude  
449 range of 119.09-153.46 dB re 1  $\mu$ Pa from 451 pulses. The background noise (RMS) in the  
450 community tank was  $137.81 \pm 0.46$  dB re 1  $\mu$ Pa, mostly composed of low frequency noise (peak  
451  $\sim 20$ Hz, all power below  $\sim 200$  Hz; when filtered, background is  $113.1 \pm 0.57$  dB re 1  $\mu$ Pa). In the  
452 assay tank, the background noise (RMS) was  $105.43 \pm 1.22$  dB re 1  $\mu$ Pa.

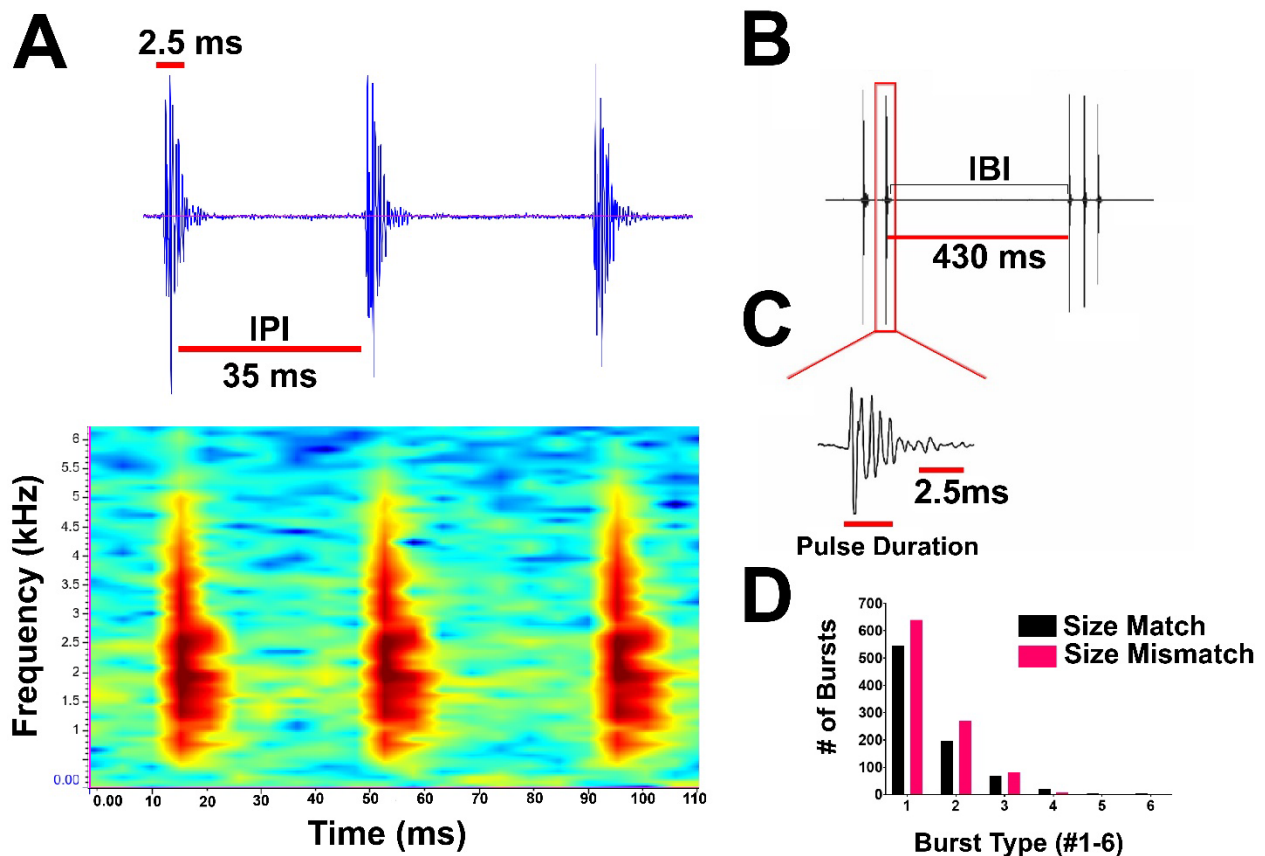

454 Fig. 5: Multi-pulse sound bursts of male *Danionella dracula*. A. Top: Oscillogram of 3-pulse  
455 burst made by lunging male. Red lines indicate for this burst that pulse durations were close to

456 2.5 ms (top, see criteria in Materials and Methods) and pulses were separated by an inter-pulse  
457 interval (IPI) around 35 ms (bottom). Below: spectrogram of the same 3-pulse burst. Darkest red  
458 indicates peak power frequency, which in this burst was 1968.750 Hz. B. Example 2- and 3-  
459 pulse bursts separated by inter-burst interval (IBI) of 430 ms. C. One of the single pulses on  
460 expanded timescale from the 2-pulse burst in B. This pulse was 2.5 ms in duration. D. Bar graph  
461 showing number of different types of multi-pulse bursts observed in size-matched (black) and  
462 size-mismatched (salmon pink) dyads.  
463

464 Regarding total acoustic display rate, males varied widely in the total number of sound  
465 pulses directed towards another male, with some time periods for individual males having more  
466 sound production than others over the course of the 2 h dyad trial (see Fig. 6A-D). In size-  
467 matched assays, males who produced sounds above the median of observed male total sound  
468 production were categorized as high sound producing males, and those exhibiting below the  
469 median were categorized as low sound producing males (Fig 6 A-E). High sound producers  
470 ranged up to 318 total sound pulses in the 30 mins sampled over the 2 h dyad trial (Fig. 6E). In  
471 size-mismatched assays, we used the same criteria as with size-matched males and found that  
472 high sound producers ranged up to 428 total sound pulses (Fig. 6E). This variation was not  
473 explained by body size, as we did not see any apparent correlation between total sound  
474 production or any of the different characteristics of sound production described here with  
475 standard length (mm) or size difference (mm) between competitors in a dyad (Fig. S3).

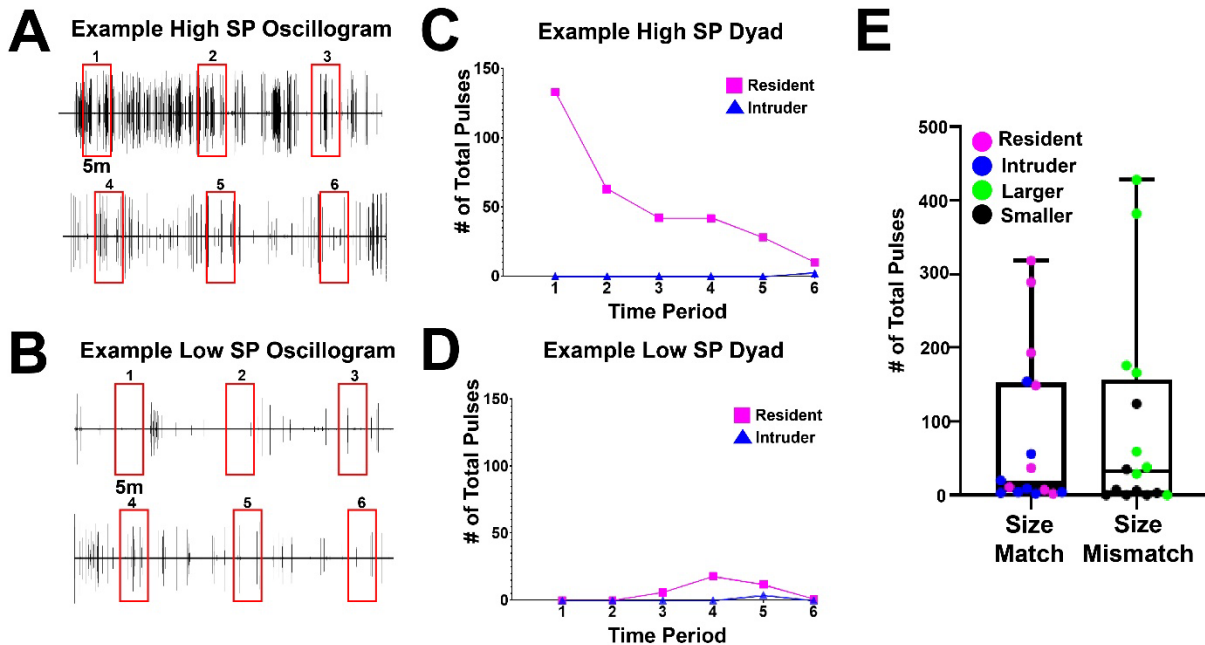

477 Fig. 6: Total sound production (SP) by *Danionella dracula* males in dyadic contests. A.  
478 Representative oscillogram of high SP; rows 1 and 2 are from one continuous 2 h record. Red  
479 boxes indicate the six 5-minute sampled time periods (1-6) spaced 15 mins apart. B.  
480 Representative oscillogram of low SP; rows 1 and 2 are from one continuous 2 h record. Red  
481 boxes indicate the six sampled time periods. C. Example high SP from size-matched dyad in A,  
482 showing the total number of pulses for individual fish over the sampled time periods. Magenta  
483 squares indicate the resident fish's SP values and blue triangles indicate the intruder fish's SP  
484 values, which are at or near zero during all time periods. D. Example low SP from size-matched  
485 dyad in B, displayed as in C. Magenta squares indicate the resident fish's SP values, which peaks  
486 at 20 sound pulses in time period 4, and blue triangles indicate the intruder fish's SP, which in  
487 this case is also at or near zero during all time periods. E. Boxplots of total individual SP in size-  
488 matched dyads (left boxplot; magenta = resident fish, blue = intruder fish) and size-mismatched  
489 dyads (right boxplot; green = relatively larger fish, black = smaller fish). Black horizontal line  
490 within box indicates median that was used to designate fish as high or low sound producer.

491

### 492 **Jaw extension during resident-intruder assay**

493 As noted in the Introduction, jaw extension often appeared to overlap sound production when we  
494 first observed *D. dracula* males in colony tanks, suggesting that sonic activity may depend on  
495 jaw extension. Thus, we also assessed the total instances of jaw extension in the dyads. Using  
496 linear regressions, we found that the number of sound bursts was significantly correlated with the  
497 number of jaw extensions in both size-matched and -mismatched contexts ( $F_{1,14}=138.3$ ,  
498  $R^2=0.9081$ ,  $p<0.0001$ ;  $F_{1,14}=79.36$ ,  $R^2=0.8501$ ,  $p<0.0001$ , respectively) (Fig. 7A, B). Jaw  
499 extension often, but not always (Fig. 7E), increased during the same 5 min time period samples  
500 of high sound production in both contexts (e.g., Fig. 7C, D).

501 When directly examining the timing of the two behaviors to each other, we observed  
502 many instances where jaw extension appeared immediately before or after instances of sound  
503 production, as well as many instances of sound production without the presence of jaw  
504 extension, and vice versa. In aggregate, the evidence suggested that sound production and jaw  
505 extension were not obligatorily linked. Nonetheless, we wanted to more rigorously examine the  
506 temporal relationship between sound production and the start of jaw extension. We did this, in  
507 part, to provide baseline data for future studies assessing the impact of genetic manipulations on  
508 this temporal relationship, as well as for comparative studies of multimodal signaling between  
509 *Danionella* species. To maximize the sample size, these values were measured in males that  
510 exhibited both high sound production and jaw extension in size-matched ( $n=5$ ) and -mismatched  
511 ( $n=3$ ) contexts. For each dyad context, we pooled together all times less than 2 sec (considering  
512 events more than 2s apart to be independent) between sonic bursts and jaw extensions and found

513 that mean time intervals between the two actions were  $492 \pm 20$  ms and  $590 \pm 33$  ms in the size-  
 514 matched and -mismatched contexts, respectively (Fig. S2B, C). We found that the temporal  
 515 separation between sounds and jaw extensions directed by the high sound producing and jaw  
 516 extending male toward the other male could occur over a wide range, although a large number  
 517 occurred within less than 100 ms in both dyad contexts and within as little as 2.5 ms and 1.3 ms  
 518 of each other in size-matched and size-mismatched dyads, respectively (Fig. S2B, C). These  
 519 results provided convincing quantitative evidence that sound production and jaw extension were  
 520 independent events, although temporal gaps between the two actions could be very brief.

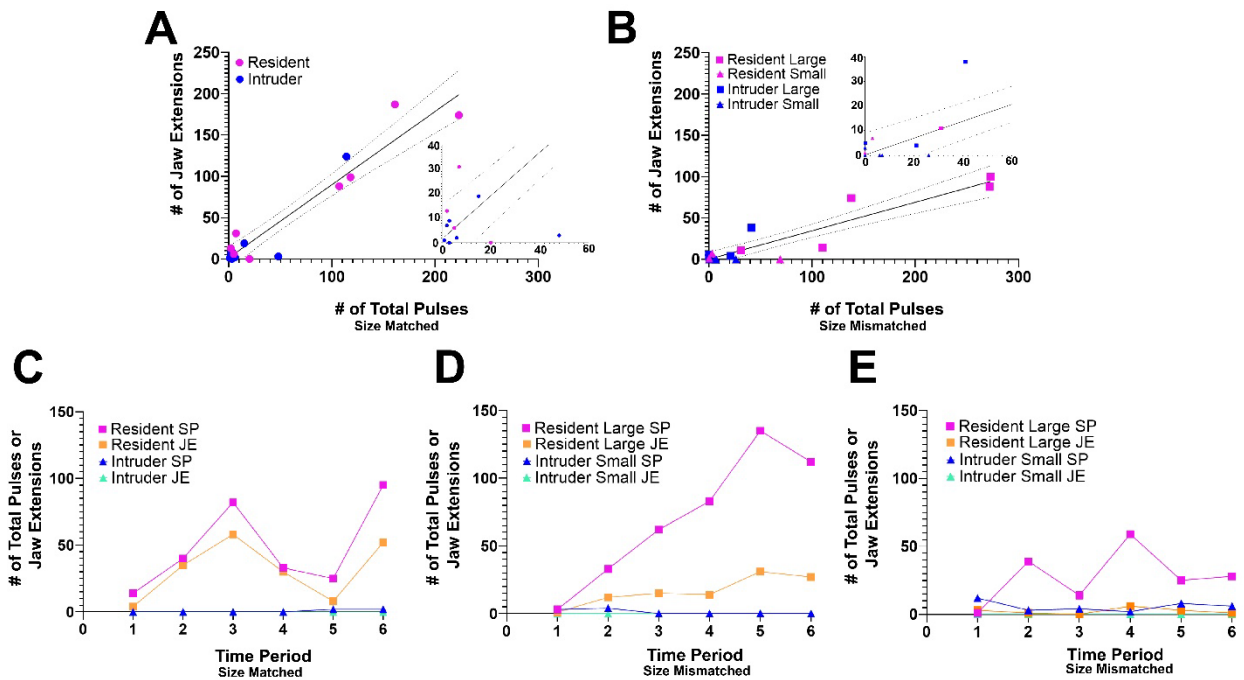

522 Fig. 7: Temporal relationship between total number of sound pulses (SP) and jaw extensions (JE)  
 523 for *Danionella dracula* males. A. Correlation plot of number of total sound bursts by number of  
 524 total JEs in size-matched contests. Magenta circles indicate resident fish and blue circles indicate  
 525 intruder fish. The black line indicates the linear regression, and the dotted light black lines  
 526 indicate 95% confidence bands. Insert is closeup on origin of plot. B. Correlation plot of number  
 527 of total sound bursts by number of total JEs in size-mismatched contests. Magenta squares  
 528 indicate relatively larger resident fish and blue squares indicate relatively larger intruder fish.  
 529 Magenta triangles indicate relatively smaller resident fish and blue triangles indicate relatively  
 530 smaller intruder fish. The black line indicates the linear regression, and the dotted light black  
 531 lines indicate 95% confidence bands. Insert is closeup on origin of plot. C-E. Examples of SP  
 532 and JE for individual fish over the six sampled 5-min time periods from size-matched and -  
 533 mismatched dyads. C. High SP and high JE from size-matched dyad. Magenta squares indicate  
 534 the resident fish's SP values and blue triangles indicate the intruder fish's SP values. Orange  
 535 squares indicate the resident fish's JE values and light blue triangles indicate the intruder fish's  
 536 JE values. The intruder fish did not extend its jaw during time periods 1-6. D. High SP and high  
 537 JE from size-mismatched dyad. Magenta squares indicate the relatively larger resident fish's SP

538 values and blue triangles indicate the relatively smaller intruder fish's SP values. Orange squares  
539 indicate the larger resident fish's JE values and light blue triangles indicate the smaller intruder  
540 fish's JE values. The smaller intruder fish did not extend its jaw during time periods 1-6. E. High  
541 SP but low JE from size-mismatched dyad. Color code same as in D. The smaller intruder fish  
542 did not extend its jaw during time periods 1-6.  
543

#### 544 **Effects of Residency Status and Size on Display Rate**

545 We next investigated the effects of residency status and size on sound production and jaw  
546 extension by examining the effect of being the resident or intruder in both dyad contexts, and the  
547 larger or smaller fish in size-mismatched assays. Residents produced significantly more sound  
548 pulses than intruders in size-matched ( $F_{1,77}=10.19$ ,  $p=0.002$ ) (Fig. 8A) and size-mismatched  
549 ( $F_{1,76}=19.36$ ,  $p<0.001$ ) (Fig. 8B) contexts; larger males, irrespective of resident or intruder  
550 status, produced significantly more sound pulses than smaller ones ( $F_{1,76}=15.38$ ,  $p<0.001$ ) (Fig.  
551 8C). The interaction between residency and size was not significant ( $F_{1,6}=3.10$ ,  $p=0.13$ ). There  
552 was also no significant effect of time period on the total amount of sound production in size-  
553 matched ( $F_{5,77}=0.46$ ,  $p=0.81$ ) and size-mismatched ( $F_{5,76}=1.63$ ,  $p=0.16$ ) contexts, indicating there  
554 was not one specific time period (1-6) during the 2 h trial that fish across the dyads used  
555 increased sound production or jaw extension. The resident fish also extended its jaw more  
556 frequently than intruders in size-matched and -mismatched contexts ( $F_{1,85}=5.39$ ,  $p=0.02$  and  
557  $F_{1,76}=9.10$ ,  $p=0.003$  respectively) (Fig. 8D, E). The same pattern held for larger and smaller fish  
558 ( $F_{1,76}=23.42$ ,  $p<0.001$ ) (Fig. 8F). The interaction between residency and size in size-mismatched  
559 contexts was not significant ( $F_{1,6}=2.25$ ,  $p=0.18$ ).



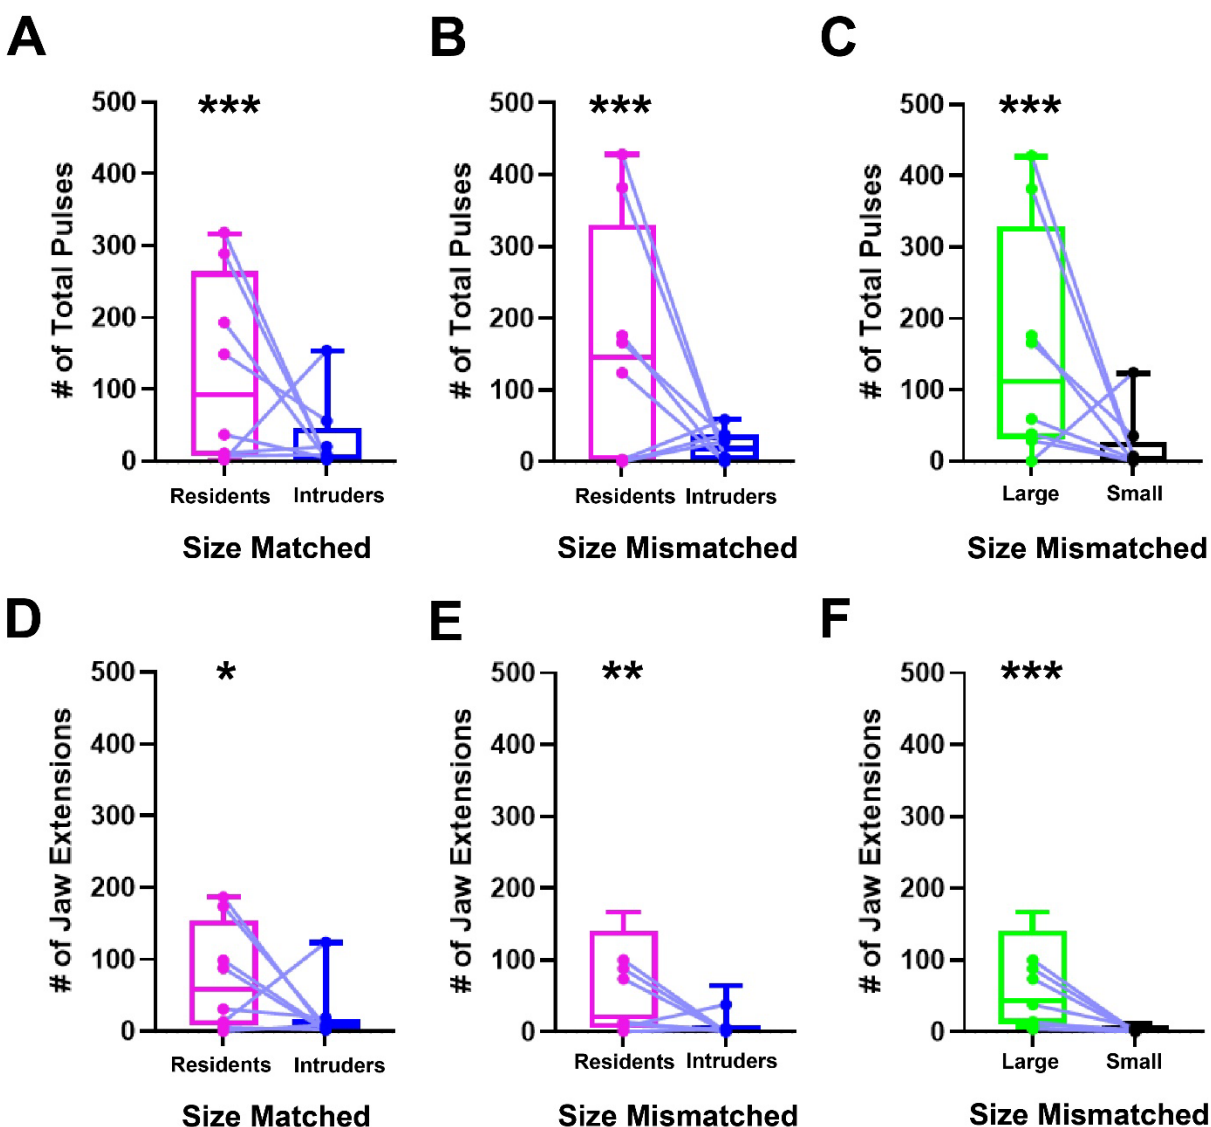

561 Fig. 8: Fish identity and sound production for *Danionella dracula* males in dyadic contests.  
562 Boxplots comparing total amount of sound production (SP) as total pulse number (A-C) and total  
563 jaw extension (JE) behaviors (D-F) in size-matched and size-mismatched contexts. Individuals in  
564 the same dyad are connected between the two boxplots compared with a light blue line. \*  
565 indicates significance as p compared to 0.05, \*\* p compared to 0.01, and \*\*\* p compared to  
566 0.001. A. Boxplots of resident (left, magenta) fish SP and intruder SP (right, blue) in size-  
567 size-matched contests. B. Boxplots of resident (left, magenta) and intruder (right, blue) fish SP in  
568 size-mismatched contests. C. Boxplots of larger (left, green) and smaller (right, black) fish SP in  
569 size-mismatched contests. D. Boxplots of resident (left, magenta) and intruder (right, blue) fish  
570 JE in size-matched contests. E. Boxplots of resident (left, magenta) and intruder (right, blue) fish  
571 JE in size-mismatched contests. F. Boxplots of larger (left, green) and smaller (right, black) fish  
572 JE in size-mismatched contests.

573

574



575

## 576 **Effects of Residency Status and Size on Multi-Pulse Burst Usage**

577 Beyond investigating the effects of residency and relative size on total display rate, we tested the  
578 hypothesis that there were differences in the temporal properties of the acoustic displays  
579 themselves, specifically in multi-pulse burst usage. We used a principal components analysis  
580 where the number of different burst types per male were entered as different variables (2-6 and  
581 2-5 pulse bursts for each male in size-matched contests and size-mismatched contests,  
582 respectively; mismatched fish did not produce 6-pulse bursts). A single principal component  
583 (PC1) explained 77% of the variation of male usage of multi-pulse bursts in size-matched males  
584 and 65% of the variation in size-mismatched males (Table S2; Fig. 9A-E). In both models,  
585 higher PC1 scores represent animals that produced a greater number of multi-pulse bursts, often  
586 with these animals also using different types of bursts (2-6 pulse bursts).

587 We first investigated how multi-pulse burst usage (PC1) varied between resident and  
588 intruders across each behavioral context. In size-matched assays, residents and intruders did not  
589 significantly differ in the number of multi-pulse bursts ( $F_{1,14}=4.09$ ,  $p=0.06$ ; Fig. 9A). Yet, in  
590 size-mismatched contests, residents produced significantly more multi-pulse bursts compared to  
591 intruders ( $F_{1,12}=5.24$ ,  $p=0.04$ ; Fig. 9B). Larger fish in size-mismatched contests, regardless of  
592 residency status, did not significantly produce more multi-pulse bursts ( $F_{1,12}=3.72$ ,  $p=0.078$ ; Fig.  
593 9C).

594 The statistics of these comparisons did not indicate a strong predictive ability of  
595 residency or relative size status on multi-pulse burst usage in our assays. What we found to be  
596 more strongly predictive, however, is that when an animal had an increased acoustic display rate,  
597 as indicated by total number of pulses produced, they demonstrated higher multi-pulse burst  
598 usage. In a separate analysis, we investigated whether high sound producers produced more  
599 multi-pulse bursts compared to low sound producers by using total sound production as a  
600 continuous variable and running a linear model for each context. High sound production,  
601 regardless of dyad context, was significantly correlated with greater multi-pulse burst usage  
602 (size-matched:  $F_{1,14}=71.71$ ,  $R^2=0.825$ ,  $p<0.001$ ; size-mismatched:  $F_{1,14}=290.3$ ,  $R^2=0.9507$ ,  
603  $p<0.001$ ; Fig. 9D, E). Therefore, we interpreted these results as the more sounds a fish produced

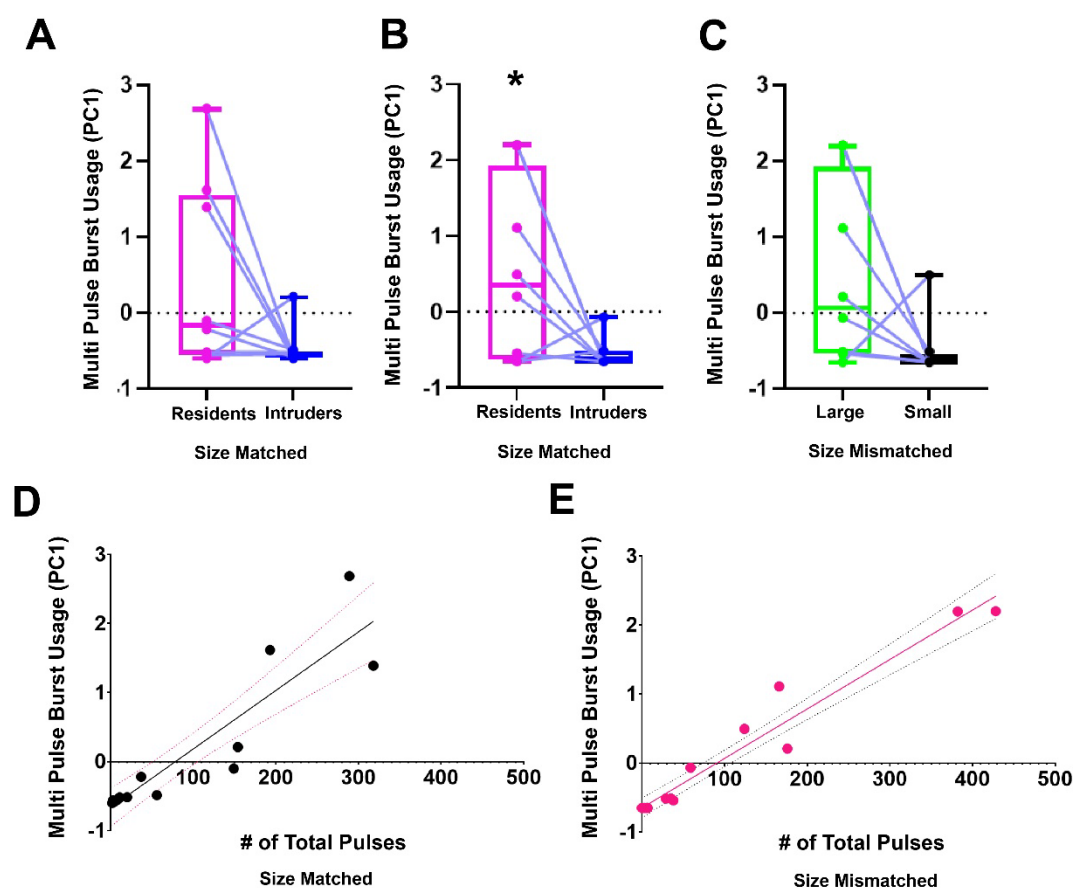

606 Fig. 9: Multi-pulse burst usage for *Danionella dracula* males in dyadic contests. A. Boxplots of  
 607 principal component 1 (PC1) describing individual male multi-pulse burst usage in size-matched  
 608 contests. Residents are in magenta, left and intruders in blue, right. Individuals in the same dyad  
 609 are connected by light blue lines. B. Boxplots of PC1 describing individual male multi-pulse  
 610 burst usage in size-mismatched contests. Residents are in magenta, left and intruders in blue,  
 611 right. Individuals in the same dyad are connected by light blue lines. \* indicates significance as p  
 612 compared to 0.05. C. Boxplots of PC1 describing individual male multi-pulse burst usage in size-  
 613 mismatched contests. Larger fish are in green, left, and smaller fish in black, right. Individuals in  
 614 the same dyad are connected by light blue lines. D. Correlation plot of number of total sound  
 615 pulses by PC1 describing individual male multi-pulse burst usage in size-matched contests.  
 616 Black circles indicate individual fish in assays. The black line indicates the fitted linear model  
 617 and the dotted light pink lines indicate 95% confidence bands. E. Correlation plot of number of  
 618 total sound pulses by PC1 describing individual male multi-pulse burst usage in size-mismatched  
 619 contests. Salmon pink circles indicate individual fish in assays. The salmon pink line indicates  
 620 the fitted linear model and the dotted black lines indicate 95% confidence bands.

## 623 **DISCUSSION**

624 We describe courtship, spawning and aggressive behaviors for *D. dracula*, the most  
625 comprehensive description to date of social behavior for any species within the *Danionella* genus  
626 of miniature vertebrates. This includes a resident-intruder assay for size-matched and size-  
627 mismatched dyads of adult males to quantitatively characterize two prominent display behaviors,  
628 sound production and lower jaw extension, that individual males produce during aggressive  
629 interactions. We report that *D. dracula* males produce sounds during agonistic, but not courtship  
630 interactions. Females are not sonic in either of these contexts or in dyad interactions with males,  
631 consistent with their apparent lack of a sound producing apparatus (Britz and Conway, 2016).  
632 The results support the hypothesis that residency results in increased total sound production.  
633 Relatively larger fish irrespective of resident or intruder status in size-mismatched assays also  
634 exhibit increased total sound production, directed towards the smaller fish in the dyad. The  
635 results do not support the hypothesis that jaw extension is a necessary condition for sound  
636 production; there is strong support for their being independent displays. We find, however, that  
637 resident males in both contexts exhibit increased jaw extension and that time periods of highest  
638 sound production and jaw extension often overlapped. Relatively larger males in size-  
639 mismatched contexts also exhibit increased aggressive behavior, with significantly increased  
640 sound production and jaw extension compared to relatively smaller fish. We also show that when  
641 sound production is high, males are making more multi-pulse bursts. In aggregate, the results  
642 show that both acoustic and postural displays can serve as robust behavioral benchmarks for  
643 comparative studies of *Danionella* species identifying neural, genomic and developmental  
644 mechanisms of social behavior evolution within a new model clade (cf. Jourjine and Hoekstra,  
645 2021).

646

### 647 ***Danionella* courtship and spawning**

648 Courtship and spawning behaviors of *D. dracula* may differ from those of *D. cerebrum*, the only  
649 other *Danionella* species for which these behaviors have been so far reported (Schulze et al.,  
650 2018). Female *D. cerebrum* are described to be the first to enter nest tubes, whereupon males  
651 follow and spawning occurs. In *D. dracula*, the male is the first to venture into the spawning  
652 crevices, followed by the female. In addition, *D. cerebrum* nest tubes are transparent and allow  
653 light in, whereas *D. dracula* requires nest coverings that create dark spawning crevices. There is

654 also no description of nest site circling in *D. cerebrum*, whereas *D. dracula* resident males swim  
655 close to nest sites from where they court females. These possible differences in courtship and  
656 spawning behaviors could parallel ones in the natural habitats of the two species. *Danionella*  
657 *cerebrum* is found in southern Myanmar and *D. dracula* in the north, which may differ in abiotic  
658 properties as well as vulnerability to predation. These are all behavioral ecological questions that  
659 need to be addressed in the future, especially once these sites become more accessible.

660

### 661 **Acoustic signaling**

662 Individual sound pulses are broadband, short in duration and possess a peak frequency close to 2  
663 kHz in all social contexts observed here. The frequency spectrum of these pulses (Fig. 5) is well  
664 within the range of hearing reported for other closely related otophysan genera that, like  
665 *Danionella*, have a Weberian apparatus for enhanced sound detection (Fay, 1988; Ladich, 2000;  
666 also see Braun and Grande, 2008; Britz and Conway 2016; Conway, Kubicek and Britz, 2021).  
667 For some teleost species, dominant frequency correlates with body size as well as with winning  
668 in dyadic contests (see Conti et al., 2015 for overview). This is not the case for *D. dracula*, at  
669 least under the conditions tested here.

670 For both size-matched and size-mismatched dyads, males predominantly make single  
671 pulse bursts, with repetitive multi-pulse bursts generated during periods of escalated sound  
672 production. Bursts of two or more pulses might signal aggressive escalation compared to single  
673 pulse bursts, which were more frequently used by all primary aggressor males. *Danionella*  
674 *dracula*'s single pulses are reminiscent of the agonistic "pops" of the bicolor damselfish,  
675 *Eupomacentrus partitus* (Myrberg, 1972). Many fish species produce multi-pulse sounds,  
676 commonly referred to as "grunts", during reproductive and aggressive interactions (Lobel, Kaatz  
677 and Rice, 2010, Amorim and Almada, 2005; Ladich and Myrberg, 2006; Myrberg and Lugli,  
678 2006; McIver et al., 2014; Lobel et al., 2021). Several damselfish species, including *E. partitus*,  
679 make multi-pulse "chirps" during reproductive interactions (Myrberg, Spanier and Ha, 1978).  
680 Although *D. dracula* males vary in multi-pulse burst usage and the overall total number of sound  
681 pulses produced during male-male dyadic interactions, there is no clear relationship to body size.  
682 Future studies of *Danionella* building on the foundation set out here should examine these  
683 acoustic characteristics in the context of nest-holding in community tanks to determine if nest-  
684 holding males differ in these characteristics compared to "loser" males, similar to other species.

685           The *Danionella* genus contains multiple species for comparative studies of both sound  
686 production and hearing (Britz, Conway and Rüber, 2021). So far, sound production has only  
687 been described in one other *Danionella* species, *D. cerebrum* (Schulze et al., 2018). Male *D.*  
688 *dracula* and *D. cerebrum* both make very short broadband, sharp onset pulses around 2 ms in  
689 duration. They also exhibit variation in how frequently they sequence bursts during male-male  
690 interactions. The sounds of both species can be grouped into bursts separated by a characteristic  
691 IPI, close to 35 ms in *D. dracula* and 8 and 17 ms in *D. cerebrum* (Schulze et al., 2018). Beyond  
692 the difference in IPI duration, there is a large species difference in the duration of individual  
693 bursts and burst trains. We find that *D. dracula* primarily make single pulse signals compared to  
694 multi-pulse bursts typically of 2-3 and rarely 4-6 pulses, at least under the conditions tested here.  
695 By contrast, *D. cerebrum* have multi-pulse bursts lasting close to 1 s and repetitive bursts lasting  
696 on the order of minutes (Schulze *et al.*, 2018). For both species, it would be of interest to  
697 compare behaviors that might be coordinated with sound production. The temporal relationship  
698 between sound production and lunging is not described for *D. cerebrum* (Schulze et al., 2018) as  
699 documented here for *D. dracula*. In addition, *D. cerebrum* lacks the hypertrophied jaw and thus  
700 the dramatic jaw extension of *D. dracula*, but perhaps it generates another type of jaw movement  
701 during aggressive interactions.

702

### 703 **Jaw extension**

704 Beyond acoustic signaling, animals use other sensory modalities to communicate in conflict  
705 scenarios, including visual mechanisms like ornaments and display postures (see Kodric-Brown,  
706 Sibly and Brown, 2006; Lappin et al., 2006). As we demonstrate, *D. dracula* males often extend  
707 their hypertrophied lower jaw during aggressive interactions. This morphological and behavioral  
708 character appears to be unique to this species within the genus. Future studies should test if jaw  
709 extension behavior functions as a visual agonistic signal, possibly allowing males to signal  
710 contest escalation and assessment information to their competitors. Jaw extension could also act  
711 to enhance characteristics of the acoustic signal, akin to the influence of vocal tract and mouth  
712 skeleton on the spectral structure and trill rates in songbirds (Podos, Huber and Taft, 2004).

713           Despite our initial observations that jaw extension was always linked to sound  
714 production, we found this to not be the case. The varied temporal separation between the two  
715 types of display, especially during periods of low sound production, as well as the independent

716 occurrence of each during male aggressive encounters, indicate these two actions are separate  
717 displays. However, the overlap of the two behaviors during periods of heightened activity  
718 provides the opportunity to study a possible multimodal signaling repertoire (e.g., see Elias et al.,  
719 2003, Amorim et al., 2019) that could maximize robustness of the overall multichannel signal  
720 (Ay, Flack and Krakauer, 2007). Males in other sonic species of fish have multimodal signaling  
721 repertoires that combine acoustic signals generated by one or more mechanisms (Rice et al.,  
722 2022). Sonic signals might also be combined with specific features of other sensory modalities,  
723 such as color and ornamentation as well as stereotyped visual dancing/movement displays  
724 (Hebets and Uetz, 2000; Elias et al., 2003; Soma and Garamszegi, 2015). Jaw extension by *D.*  
725 *dracula* males could serve as a modifier or amplifier of sound production as well, not  
726 contributing its own information but instead augmenting the acoustic signal (Bradbury and  
727 Vehrencamp, 2011; Gualla, Cermelli, and Castellano, 2008; Lappin et al., 2006). For a more  
728 rigorous investigation of possible temporal coupling/coordination of acoustic and postural  
729 displays in *D. dracula* and hence multimodal signaling, the concurrency of sound production and  
730 jaw extension should be best re-visited with higher resolution video than used here to examine  
731 the timing more precisely between these displays, as done for other sonic species (e.g., Bostwick  
732 and Prum, 2003; Fusani et al., 2007).

733

### 734 **Individual Assessment**

735 Resources such as shelters and territories are continually defended by an owner to gain fitness  
736 advantages (Conti et al., 2015; Arnott and Elwood, 2007). *Danionella dracula* males swim  
737 closely around nest sites that contain spawning crevices. Future studies would benefit from  
738 examining if and how males might utilize acoustic communication and other signaling modalities  
739 (e.g., vision) to structure dominance hierarchies and determine nest ownership in a community  
740 (Conti et al., 2015; Chase et al., 2002, Amorim and Almada, 2005, Arnott and Elwood, 2009,  
741 Barata et al., 2007, Myrberg and Riggio, 1985). It would also be essential to determine how nest-  
742 holding males might differ from other males in complex acoustic parameters like IPI and multi-  
743 pulse burst usage, as well as factors that contribute to fighting potential examined here like nest  
744 ownership and body size. Ownership is a factor that can contribute to an overall animal's  
745 motivation, which can often be inferred from competitors' display rate, or continued agonistic  
746 engagement and escalation over resource items, and it can be influenced by internal physiology



747 and perceived resource quality (Bradbury and Vehrencamp, 2011; Arnott and Elwood, 2007;  
748 Brown, Chimenti, and Siebert, 2007; Lindström, 1992). How does ownership of a nest site in a  
749 community setting affect fighting strategy and escalation, as could be indicated by display rate  
750 and sonic characteristics in *D. dracula*? And is it the largest male in the community that holds  
751 this nest site? Body size is often a determinant of winning an escalated fight in most animal  
752 species, especially those with high variation in body size (Andersson, 1994). A display posture  
753 can advantageously reveal body size, and larger animals can produce or bear relatively larger  
754 ornaments (Bro-Jørgensen, 2009). We see a size effect in *D. dracula* where the larger male most  
755 often (7/8 dyads) is the primary aggressor in size-mismatched dyads. This size asymmetry effect  
756 in *D. dracula* contests is reminiscent of Assessor-like strategies (Parker, 1974; Arnott and  
757 Elwood, 2009) and resembles other species which can assess differences in body size (see  
758 Introduction). In size-matched dyads however, we found a distinct resident effect in the absence  
759 of size differences between males, indicating the possible presence of a strategy in *D. dracula*  
760 contests where residents are predicted to escalate aggression compared to intruders (Maynard  
761 Smith, 1979), and so there may be possible tradeoffs between residency and size asymmetry in  
762 *D. dracula* fighting strategies (Hack, Thompson and Fernandes, 2010; Hofmann and  
763 Schildberger, 2001; Jennions and Backwell, 1996, Jackson and Cooper, 1991).

764

### 765 **Concluding Comments**

766 We demonstrate that *D. dracula* is a sonic species and characterize the sounds produced by  
767 individual males in dyadic assays for size-matched and size-mismatched contexts, uncovering  
768 initial residency and body size effects on aggressive behaviors in this species. Future  
769 physiological investigations of auditory sensitivity (see Bass and McKibben, 2003), as well as  
770 whole-brain neuroimaging of *Danionella* (Schulze et al., 2018; Chow et al., 2020), can determine  
771 the components of natural acoustic and visual/postural signals that are attended to by both males  
772 and females. The results presented here are a basis for subsequent behavioral studies  
773 determining how *Danionella* species in general may assess each other's fighting ability via  
774 multiple sensory modalities, such as audition and vision for observing sonic and postural (jaw  
775 extension) behaviors, respectively. The temporal relationship of sound production to other  
776 displays such as jaw extension could also allow researchers to determine how such actions may  
777 augment the information conveyed through sound production, perhaps acting as a tactical threat



778 or amplifier (see Bradbury and Vehrencamp, 2011). Last, our experiments provide a foundation  
779 on which to test established social behavioral models of conflict resolution such as fighting  
780 strategy models (see Bradbury and Vehrencamp, 2011), which altogether would make a  
781 comprehensive framework on which to study the neural and genetic drivers of social behaviors in  
782 *Danionella* species.

783

## 784 ACKNOWLEDGEMENTS

785 We sincerely thank Kevin Conway for his early and very generous guidance in setting up a  
786 breeding tank of *D. dracula*, and Michael Sheehan for many helpful comments on the  
787 manuscript. We also thank the Cornell Statistical Consulting Unit for discussions on data analysis.  
788 We also thank Melissa Hoffman for animal care and Margaret Marchaterre for logistical support.

789

## 790 FOOTNOTES

### 791 **Author Contributions**

792 Conceptualization: R.L.T., A.H.B., H.K.R.; Methodology: R.L.T., A.H.B, S.C.C., J.T.P, E.R.S.,  
793 H.K.R; Validation: R.L.T.; Statistical analyses: R.L.T., E.R.S., H.K.R; Data aggregation: R.L.T.,  
794 Z.G., S.C.C., J.T.P., H.K., W.F; Data curation: R.L.T.; Writing - initial draft: R.L.T., A.H.B.;  
795 Revision: R.L.T., A.H.B, Z.G., S.C.C., J.T.P, E.R.S., H.K.R; Visualization: R.L.T.; Resources,  
796 Supervision, Project administration, Funding acquisition: A.H.B. All authors approved the final  
797 version of the manuscript.

798

### 799 **Funding**

800 This research was supported from NSF IOS-1457108 and IOS-1656664, and Cornell University  
801 (AHB).

### 802 **Competing Interests**

803 The authors declare no competing or financial interests.

804

805

806

807 REFERENCES

- 808 Akbari, N., Tatarsky, R.L., Bass, A.H., Xu, C. (2020). Whole brain optical access in adult  
809 vertebrates: two- and three-photon imaging in a miniature fish, *Danionella priapus*. In  
810 *Conference on Lasers and Electro-Optics*. Washington, D.C.: OSA, p. SW4P.2.  
811 doi:10.1364/CLEO\_SI.2020.SW4P.2.
- 812 Akbari, N., Tatarsky, R.L., Bass, A.H., Xu, C. (2021). Label-free map of adult *Danionella*  
813 *dracula* brain for in vivo navigation using third harmonic generation microscopy. In  
814 *Biophotonics Congress*. Washington, D.C.: OSA, p. BTu3B.3.  
815 doi:10.1364/CLEO\_SI.2020.SW4P.2.
- 816 Amorim, M.C.P. (2006). Diversity of sound production in fish. In *Communication in Fishes*, vol.  
817 1 (ed. F. Ladich, S. P. Collin, P. Moller and B. G. Kapoor), pp. 71-105. Enfield, NH: Science  
818 Publishers.
- 819 Amorim, M.C.P. (2015). Fish sounds and mate choice. In *Sound Communication in Fishes* (ed.  
820 F. Ladich). pp. 1–33. Vienna, Austria: Springer Vienna.
- 821 Amorim, M.C.P., Fonseca P.J., Mathevon, N., Beauchaud, M. (2019). Assessment of fighting  
822 ability in the vocal cichlid *Metriaclima zebra* in face of incongruent audiovisual information.  
823 *Biology Open*, 8(12):bio043356. doi:10.1242/bio.043356.
- 824 Amorim, M.C.P. and Almada, V.C. (2005). The outcome of male-male encounters affects  
825 subsequent sound production during courtship in the cichlid fish *Oreochromis mossambicus*.  
826 *Animal Behaviour*, 69(3), 595–601. doi:10.1016/j.anbehav.2004.06.016.
- 827 Andersson, M. (1994). *Sexual Selection*. Princeton, NJ: Princeton University Press.
- 828 Arnott, G. and Elwood, R.W. (2007). Fighting for shells: How private information about  
829 resource value changes hermit crab pre-fight displays and escalated fight behaviour. *Proceedings*  
830 *of the Royal Society B: Biological Sciences*, 274(1628), 3011–3017. doi:10.1098/rspb.2007.1196.
- 831 Arnott, G. and Elwood, R.W. (2009). Assessment of fighting ability in animal contests. *Animal*  
832 *Behaviour*, 77(5), 991–1004. doi:10.1016/j.anbehav.2009.02.010.
- 833 Ay, N., Flack, J. and Krakauer, D.C. (2007). Robustness and complexity co-constructed in  
834 multimodal signalling networks. *Philosophical Transactions of the Royal Society B: Biological*  
835 *Sciences*, 362(1479), 441–447. doi:10.1098/rstb.2006.1971.
- 836 Barata, E.N., Hubbard, P.C., Almeida, O.G., Miranda, A., Canário, A.V.M. (2007). Male urine  
837 signals social rank in the Mozambique tilapia (*Oreochromis mossambicus*). 5, 54, 1–11.  
838 doi:10.1186/1741-7007-5-54.
- 839 Bass, A.H. and McKibben, J.R. (2003). Neural mechanisms and behaviors for acoustic  
840 communication in teleost fish. *Progress in Neurobiology*, 69(1), 1–26, Amsterdam, Netherlands:  
841 Elsevier Science. doi:10.1016/S0301-0082(03)00004-2.

- 842 Billings, A.C. (2018). The low-frequency acoustic structure of mobbing calls differs across  
843 habitat types in three passerine families. *Animal Behaviour*, 138, 39–49.  
844 doi:10.1016/j.anbehav.2018.02.001.
- 845 Bostwick, K.S. and Prum, R.O. (2003). High-speed video analysis of wing-snapping in two  
846 manakin clades (Pipridae: Aves). *Journal of Experimental Biology*, 206(20), 3693–3706.  
847 doi:10.1242/jeb.00598.
- 848 Bradbury, J.W. and Vehrencamp, S.L. (2011). *Principles of Animal Communication*. 2nd edn.  
849 Sunderland, Mass.: Sinauer Associates.
- 850 Braun, C.B. and Grande, T. (2008). Evolution of peripheral mechanisms for the enhancement of  
851 sound reception. In *Fish Bioacoustics*. (ed. Webb, J.F., Fay, R. R., and Popper, A. N.), 99–144,  
852 New York, NY: Springer Publishing.
- 853 Britz, R. and Conway, K.W. (2016). *Danionella dracula*, an escape from the cypriniform  
854 Bauplan via developmental truncation? *Journal of Morphology*, 277(2), 147–166.  
855 doi:10.1002/jmor.20486.
- 856 Britz, R., Conway, K.W. and Rüber, L. (2009). Spectacular morphological novelty in a miniature  
857 cyprinid fish, *Danionella dracula n. sp.* *Proceedings of the Royal Society B: Biological Sciences*,  
858 276(1665), 2179–2186. doi:10.1098/rspb.2009.0141.
- 859 Britz, R., Conway, K.W. and Rüber, L. (2021). The emerging vertebrate model species for  
860 neurophysiological studies is *Danionella cerebrum*, new species (Teleostei: Cyprinidae).  
861 *Scientific Reports*, 11(1). doi:10.1038/s41598-021-97600-0.
- 862 Bro-Jørgensen, J. (2009). Dynamics of multiple signalling systems: animal communication in a  
863 world in flux. *Trends in Ecology and Evolution*, 292–300. doi:10.1016/j.tree.2009.11.003.
- 864 Brown, W.D., Chimenti, A.J., and Siebert, J.R. (2007). The payoff of fighting in house crickets:  
865 motivational asymmetry increases male aggression and mating success. *Ethology*, 113, 457–465.  
866 doi: 10.1111/j.1439-0310.2007.01357.x
- 867 Burmeister, S.S., Ophir, A.G., Ryan, M.J., Wilczynski, W. (2002). Information transfer during  
868 cricket frog contests. *Animal Behaviour*, 64(5), 715-725. doi: 10.1006/anbe.2002.4012
- 869 Chase, I.D., Tovey, C., Spangler-Martin, D., Manfredonia, M. (2002). Individual differences  
870 versus social dynamics in the formation of animal dominance hierarchies. 99(8), 5744–5749. doi:  
871 10.1073/pnas.082104199
- 872 Chow, D.M., Sinefeld, D., Kolkman, K.E., Ouzounov, D.G., Akbari, N., Tatarsky, R.L., Bass,  
873 A.H., Xu, C., Fetcho, J.R. (2020). Deep three-photon imaging of the brain in intact adult  
874 zebrafish. *Nature Methods*, 17(6), 605–608. doi:10.1038/s41592-020-0819-7.
- 875 Conway, K.W., Kubicek, K.M., Britz, R. (2021). Extreme evolutionary shifts in developmental  
876 timing establish the miniature *Danionella* as a novel model in the neurosciences. *Developmental*  
877 *Dynamics*, 250, 601-611. doi:10.1002/dvdy.280

- 878 Clutton-Brock, T.H. and Albon, S.D. (1979). The roaring of red deer and the evolution of honest  
879 advertisement. *Behaviour*, 69(3–4), 145–170. doi: 10.1163/156853979X00449
- 880 Conti, C., Fonseca, P. J., Picciulin, M., Amorim, M.C.P. (2015). How effective are acoustic  
881 signals in territorial defence in the Lusitanian toadfish? *Journal of Experimental Biology*, 218(6),  
882 893–898. doi:10.1242/jeb.116673.
- 883 Davies, N.B. and Halliday, T.R. (1978). Deep croaks and fighting assessment in toads *Bufo bufo*.  
884 *Nature*, 274, 683–685. doi: 10.1038/274683a0
- 885 Elias, D.O., Mason, A.C., Maddison, W.P., Hoy, R.R. (2003). Seismic signals in a courting male  
886 jumping spider (Araneae: Salticidae). *Journal of Experimental Biology*, 206(22), 4029–4039.  
887 doi:10.1242/jeb.00634.
- 888 Fay, R.R. (1988). Peripheral Adaptations for Spatial Hearing in Fish. In *Sensory Biology of*  
889 *Aquatic Animals*. (ed. Atema, J., Fay, R. R., Popper, A. N., and Tavolga, W. N.) pp. 711–731,  
890 Berlin, Germany: Springer-Verlag.
- 891 Friard, O. and Gamba, M. (2016). BORIS: a free, versatile open-source event-logging software  
892 for video/audio coding and live observations. *Methods in Ecology and Evolution*, 7(11), 1325–  
893 1330. doi:10.1111/2041-210X.12584.
- 894 Fusani, L., Giordano, M., Day, L.B., Schlinger, B.A. (2007). High-speed video analysis reveals  
895 individual variability in the courtship displays of male Golden-collared manakins. *Ethology*,  
896 113(10), 964–972. doi:10.1111/j.1439-0310.2007.01395.x.
- 897 Gerhardt, H.C. and Huber, F. (2002). *Acoustic Communication in Insects and Anurans: Common*  
898 *Problems and Diverse Solutions*. Chicago, IL: University of Chicago Press.
- 899 Goldman, R. (2021) “Myanmar’s coup, explained.” *The New York Times*, 1 Feb. 2021.  
900 [www.nytimes.com/article/myanmar-news-protests-coup.html](http://www.nytimes.com/article/myanmar-news-protests-coup.html). Accessed 9 Jan. 2022.
- 901 Green, P.A. and Patek, S.N. (2018). Mutual assessment during ritualized fighting in mantis  
902 shrimp (Stomatopoda). *Proceedings of the Royal Society B: Biological Sciences*, 285(1871).  
903 doi:10.1098/rspb.2017.2542.
- 904 Gualla, F., Cermelli, P., Castellano, S. (2008). Is there a role for amplifiers in sexual selection?  
905 *Journal of Theoretical Biology*, 252: 255–271. doi: 10.1016/j.jtbi.2008.02.019
- 906 Hack, M.A., Thompson, D.J. and Fernandes, D.M. (2010). Fighting in males of the autumn  
907 spider, *Metellina segmentata*: effects of relative body size, prior residency and female value on  
908 contest outcome and duration. *Ethology*, 103, 488–498. doi:10.1111/j.1439-0310.1997.tb00162.x
- 909 Hebets, E.A. and Uetz, G.W. (2000). Leg ornamentation and the efficacy of courtship displays in  
910 four species of wolf spider (Araneae: Lycosidae). *Behavioral Ecology and Sociobiology*, 47(4):  
911 280–286. doi:10.1007/s002650050667

- 912 Hofmann, H.A. and Schildberger, K. (2001). Assessment of strength and willingness to fight  
913 during aggressive encounters in crickets. *Animal Behaviour* 62: 337–348.  
914 doi:10.1006/anbe.2001.1746
- 915 Hsu, Y. Lee, S., Chen, M., Yang, S., Cheng, K. (2008). Switching assessment strategy during a  
916 contest: fighting in killifish *Kryptolebias marmoratus*. *Animal Behaviour*, 75(5), 1641–1649.  
917 doi:10.1016/j.anbehav.2007.10.017.
- 918 UN Human Rights Council. (2018). Report of the independent international fact-finding mission  
919 on Myanmar. New York, NY: United Nations.
- 920 Jackson, R.R. and Cooper, K.J. (1991). The influence of body size and prior residency on the  
921 outcome of male-male interactions of *Marpissa marina*, a New Zealand jumping spider (Araneae  
922 salticidae). *Ethology Ecology and Evolution*, 3(1), 79–82. doi:10.1080/08927014.1991.9525391.
- 923 Jennions, M.D. and Backwell, P.R.Y. (1996). Residency and size affect fight duration and  
924 outcome in the fiddler crab *Uca annulipes*. *Biological Journal of the Linnean Society*, 57(4),  
925 293–306. doi:10.1111/j.1095-8312.1996.tb01851.x
- 926 Jourjine, N. and Hoekstra, H.E. (2021). Expanding evolutionary neuroscience: insights from  
927 comparing variation in behavior. *Neuron*, 109(7), 1084–1099. doi:10.1016/j.neuron.2021.02.002.
- 928 K. Lisa Yang Center for Conservation Bioacoustics. (2019). Raven Pro: Interactive Sound  
929 Analysis Software (Version 1.6.1) [Computer software]. Ithaca, NY: The Cornell Lab of  
930 Ornithology. Available from <https://ravensoundsoftware.com/>.
- 931 Kodric-Brown, A., Sibly, R.M., and Brown, J.H. (2006). The allometry of ornaments  
932 and weapons. *Proceedings of the National Academy of Sciences of the United States*  
933 *of America* 103: 8733–8738. doi: 10.1073/pnas.0602994103
- 934 Koolhaas, J.M., Coppens C.M., de Boer, S.F., Buwalda, B., Meerlo, P., Timmermans P.J.A.  
935 (2013). The resident-intruder paradigm: a standardized test for aggression, violence and social  
936 stress. *JoVE*, 77, e4367. doi:10.3791/4367.
- 937 Ladich, F. (2000). Acoustic communication and the evolution of hearing in fishes. *Philosophical*  
938 *Transactions of the Royal Society B: Biological Sciences*. 355(1401), 1285–1288.  
939 doi:10.1098/rstb.2000.0685.
- 940 Ladich, F. and Maiditsch, I.P. (2017). Acoustic signalling in female fish: factors influencing  
941 sound characteristics in croaking gouramis. *Bioacoustics*. 27:4, 377–390.  
942 doi:10.1080/09524622.2017.1359669
- 943 Ladich, F. and Myrberg, A.A. Jr. (2006). Agonistic behavior and acoustic communication. In  
944 *Communication in Fishes*, vol. 1 (ed. F. Ladich, S. P. Collin, P. Moller and B. G. Kapoor), pp.  
945 121–148. Enfield, NH: Science Publishers.
- 946 Lappin, A.K., Brandt, Y., Husak, J.F., Macedonia, J.M., and Kemp, D.J. (2006). Gaping displays  
947 reveal and amplify a mechanically based index of weapon performance. *American Naturalist*  
948 168: 100–113. doi: 10.2307/3844679

- 949  
950 Lindström, K. (1992). The effect of resource holding potential, nest size and information about  
951 resource quality on the outcome of intruder–owner conflicts in the sand goby. *Behavioral*  
952 *Ecology and Sociobiology*, 30: 53–58. doi: 10.1007/BF00168594  
953
- 954 Lobel, P.S., Garner, J.G., Kaatz, I.M., Rice, A.N. (2021) Sonic cichlids. In *Behavior, Ecology*  
955 *and Evolution of Cichlid Fishes*, (ed. Abate, M.E. and Noakes, D.L.G), pp. 443-502. New York,  
956 NY: Springer Publishing.  
957
- 958 Lobel, P.S., Kaatz, I.M. and Rice, A.N. (2010). Acoustical behavior of coral reef fishes. In  
959 *Reproduction and Sexuality in Marine Fishes: Patterns and Processes*, (ed. Cole, K.S.), pp. 307-  
960 386. Berkeley, CA: University of California Press, doi:10.1525/9780520947979-013.
- 961 Maynard Smith, J. M. (1979). Game theory and the evolution of behavior. *Proceedings of the*  
962 *Royal Society of London Series B-Biological Sciences* 205: 475–488.  
963 doi:10.1098/rspb.1979.0080
- 964 McIver, E.L., Marchaterre, M.A., Rice, A.N., Bass, A.H. (2014). Novel underwater soundscape:  
965 Acoustic repertoire of plainfin midshipman fish. *Journal of Experimental Biology*, 217(13),  
966 2377–2389. doi:10.1242/jeb.102772.
- 967 Myrberg, A.A. (1972). Ethology of the bicolor damselfish, *Eupomacentrus Partitus* (Pisces:  
968 Pomacentridae): A Comparative Analysis of Laboratory and Field Behaviour. *Animal Behaviour*  
969 *Monographs*, 5, 90002–90004. doi:10.1016/0003-3472(72)90002-4
- 970 Myrberg, A.A. and Riggio, R.J. (1985). Acoustically mediated individual recognition by a coral  
971 reef fish (*Pomacentrus partitus*). *Animal Behaviour*, 33(2), 411–416. doi:10.1016/S0003-  
972 3472(85)80065-8
- 973 Myrberg, A.A. Jr. and Lugli, M. (2006). Reproductive behavior and acoustical interactions. In  
974 *Communication in Fishes*, vol. 1 (ed. F. Ladich, S. P. Collin, P. Moller and B. G. Kapoor), pp.  
975 149-176. Enfield, NH: Science Publishers.
- 976 Myrberg, A.A. Jr., Spanier, E. and Ha, S.J. (1978). *Contrasts in Behavior: Adaptations in the*  
977 *Aquatic and Terrestrial Environments*. (ed. E.S. Reese and F.J. Lighter), New York, NY: J.  
978 Wiley.
- 979 Odom, K.J., Araya-Salas, M., Morano, J.L., Ligon, R.A., Leighton, G.M., Taff, C.C., Dalziell,  
980 A.H., Billings, A.C., Germain, R.R., Pardo, M., Guimarães de Andrade, L., Hedwig, D., Keen,  
981 S.C., Shiu, Y., Charif, R.A., Webster, M.S., Rice, A.N. (2021). Comparative bioacoustics: a  
982 roadmap for quantifying and comparing animal sounds across diverse taxa. *Biological Reviews*,  
983 96(4), 1135–1159. doi:10.1111/brv.12695.
- 984 Oliveira, R.F., Silva, J.F. and Simo, M. (2011). Fighting Zebrafish : Characterization of  
985 Aggressive Behavior and Winner–Loser Effects. *Zebrafish*, 8(2). doi:10.1089/zeb.2011.0690.



- 986 Olivier, D., Frédérich, B., Herrel, A., Parmentier, E. (2015). A morphological novelty for feeding  
987 and sound production in the yellowtail clownfish. *Journal of Experimental Zoology Part A:*  
988 *Ecological Genetics and Physiology*, 323(4), 227–238. doi:10.1002/jez.1907.
- 989 Parker, G.A., (1974). Assessment strategy and evolution of fighting behavior. *Journal of*  
990 *Theoretical Biology*, 47, 223-243. doi: 10.1016/0022-5193(74)90111-8
- 991 Pereira, R., Rismondo, S., Caiano, M., Pedroso, S.S., Fonseca, P.J., Amorim, M.C.P. (2014). The  
992 role of agonistic sounds in male nest defence in the painted goby *Pomatoschistus pictus*.  
993 *Ethology*, 120(1), 53–63. doi:10.1111/eth.12180.
- 994 Podos, J., Huber, S.K. and Taft, B. (2004). Bird song: The interface of evolution and mechanism.  
995 *Annual Review of Ecology, Evolution, and Systematics*, 55–87.  
996 doi:10.1146/annurev.ecolsys.35.021103.105719.
- 997 R Core Team (2021) “R: A language and environment for statistical computing.” Vienna,  
998 Austria: R Foundation for Statistical Computing. Available at: <https://www.R-project.org/>.
- 999 Rice, A.N., Farina, S.C., Makowski, A.J., Kaatz, I.M., Lobel, P.S., Bemis, W.E., Bass, A.H.  
1000 (2022). Evolutionary patterns and processes of sound production across fishes. *Ichthyology and*  
1001 *Herpetology*, 110 (1), 1-12. doi:10.1643/i2020172
- 1002 Schulze, L., Henninger, J., Kadobianskyi, M., Chaigne, T., Faustino, A.I., Hakiy, N., Albadri, S.,  
1003 Schuelke, M., Maler, L., Del Bene, F., Judkewitz, B. (2018). Transparent *Danionella translucida*  
1004 as a genetically tractable vertebrate brain model. *Nature Methods*, 15(11), 977–983.  
1005 doi:10.1038/s41592-018-0144-6.
- 1006 Sebastianutto, L., Picciulin, M., Costantini, M., Rocca, M., Ferrero, E.A. (2008). Four type of  
1007 sounds for one winner: Vocalizations during territorial behavior in the red-mouthed goby *Gobius*  
1008 *cruentatus* (Pisces Gobiidae). *Acta Ethologica*, 11(2), 115–121. doi:10.1007/s10211-008-0048-z.
- 1009 Soma, M. and Garamszegi, L.Z. (2015). Evolution of courtship display in Estrildid finches:  
1010 Dance in relation to female song and plumage ornamentation. *Frontiers in Ecology and*  
1011 *Evolution*, 3. doi:10.3389/fevo.2015.00004.
- 1012 Triefenbach, F.A. and Zakon, H.H. (2008). Changes in signalling during agonistic interactions  
1013 between male weakly electric knifefish, *Apteronotus leptorhyncus*. *Animal Behaviour*, 75(4),  
1014 1263-1272. doi:10.1016/j.anbehav.2007.09.027
